# Supplementary material for: Quantity of opioids consumed following an emergency department visit for acute pain: a Canadian prospective cohort study
Source: PubMed Central journal article supplement — BMJ Open. 2018 Sep 17;8(9):e022649. doi: 10.1136/bmjopen-2018-022649 (PMC6144484; doi:10.1136/bmjopen-2018-022649), 2018-09-17
Supplement: bmjopen-2018-022649.draft_revisions.pdf [file bmjopen-2018-022649.draft_revisions.pdf]

# BMJ Open

BMJ Open is committed to open peer review. As part of this commitment we make the peer review history of every article we publish publicly available.

When an article is published we post the peer reviewers' comments and the authors' responses online. We also post the versions of the paper that were used during peer review. These are the versions that the peer review comments apply to.

The versions of the paper that follow are the versions that were submitted during the peer review process. They are not the versions of record or the final published versions. They should not be cited or distributed as the published version of this manuscript.

BMJ Open is an open access journal and the full, final, typeset and author-corrected version of record of the manuscript is available on our site with no access controls, subscription charges or pay-per-view fees (<http://bmjopen.bmj.com>).

If you have any questions on BMJ Open's open peer review process please email [info.bmjopen@bmj.com](mailto:info.bmjopen@bmj.com)

# BMJ Open

## Quantity of opioids consumed following an emergency department visit for acute pain: a prospective cohort study.

|                               |                                                                                                                                                                                                                                                                                                                                                                                                                                                                                                                                                                                                                                                                                                                                                                                               |
|-------------------------------|-----------------------------------------------------------------------------------------------------------------------------------------------------------------------------------------------------------------------------------------------------------------------------------------------------------------------------------------------------------------------------------------------------------------------------------------------------------------------------------------------------------------------------------------------------------------------------------------------------------------------------------------------------------------------------------------------------------------------------------------------------------------------------------------------|
| Journal:                      | <i>BMJ Open</i>                                                                                                                                                                                                                                                                                                                                                                                                                                                                                                                                                                                                                                                                                                                                                                               |
| Manuscript ID                 | bmjopen-2018-022649                                                                                                                                                                                                                                                                                                                                                                                                                                                                                                                                                                                                                                                                                                                                                                           |
| Article Type:                 | Research                                                                                                                                                                                                                                                                                                                                                                                                                                                                                                                                                                                                                                                                                                                                                                                      |
| Date Submitted by the Author: | 28-Feb-2018                                                                                                                                                                                                                                                                                                                                                                                                                                                                                                                                                                                                                                                                                                                                                                                   |
| Complete List of Authors:     | Daoust, Raoul; Hôpital Sacré-Coeur de Montréal, Emergency<br>Paquet, Jean; Hôpital Sacré-Coeur de Montréal, Emergency<br>Cournoyer, Alexis; Université de Montréal Faculté de médecine, ; Hôpital<br>du Sacre-Coeur de Montreal, Department of Emergency Medicine<br>Piette, Éric; Hôpital Sacré-Coeur de Montréal, Emergency<br>Morris, Judy; HSCM, Emergency Medicine<br>Gosselin, Sophie; McGill University Health Centre, Department of Medicine<br>and Emergency Medicine<br>Émond, Marcel; Université Laval Faculté de médecine, Département de<br>médecine d'urgence et famille<br>Lavigne, Gilles; Université de Montréal, Médecine dentaire<br>Lee, Jacques; University of Toronto, Clinical Epidemiology Unit<br>Chauny, Jean-Marc; Centre de recherche de l'Hôpital du Sacré-Cœur, |
| Keywords:                     | ACCIDENT & EMERGENCY MEDICINE, PAIN MANAGEMENT, Substance<br>misuse < PSYCHIATRY                                                                                                                                                                                                                                                                                                                                                                                                                                                                                                                                                                                                                                                                                                              |
|                               |                                                                                                                                                                                                                                                                                                                                                                                                                                                                                                                                                                                                                                                                                                                                                                                               |

SCHOLARONE™  
Manuscripts

Only

1  
2 **Quantity of opioids consumed following an emergency department visit for acute pain: a**  
3 **prospective cohort study.**  
4

5 Raoul Daoust,<sup>a,b</sup> MD, MSc, Jean Paquet,<sup>a</sup> PhD, Alexis Cournoyer,<sup>a,b</sup> MD, Éric Piette,<sup>a,b</sup> MD, MSc,  
6 Judy Morris,<sup>a,b</sup> MD, MSc, Sophie Gosselin,<sup>e</sup> MD, Marcel Émond,<sup>c,d</sup> MD, MSc, Gilles Lavigne,<sup>g,h</sup>  
7 DMD, PhD, Jacques Lee,<sup>i</sup> MD, Jean-Marc Chauny,<sup>a,b</sup> MD, MSc  
8  
9

10  
11 <sup>a</sup>Department of Emergency Medicine, Research Centre, CIUSSS-Nord-de-l'Île de-Montréal, Sacré-  
12 Coeur Hospital, Montréal, Québec, Canada  
13

14 <sup>b</sup>Département Médecine Familiale et Médecine d'Urgence, Faculté de Médecine, Université de  
15 Montréal, Montréal, Québec, Canada  
16

17 <sup>c</sup>Département de médecine d'urgence et famille, Faculté de médecine, Université Laval, Québec,  
18 Canada  
19

20 <sup>d</sup>Département d'urgence du CHU-Québec, Québec, Canada  
21

22 <sup>e</sup>Department of Emergency Medicine, McGill University Health Centre, McGill University, Montreal,  
23 Québec, Canada  
24

25 <sup>f</sup>Trauma, Research Centre, CIUSSS-Nord-de-l'Île de-Montréal, Sacré-Coeur Hospital, Montréal,  
26 Québec, Canada  
27

28 <sup>g</sup>Faculties of Dental Medicine and Medicine, Université de Montréal, Montréal, Québec, Canada  
29

30 <sup>h</sup>Centre for Advanced Research in Sleep Medicine, Hôpital du Sacré-Coeur de Montréal (CIUSSS du  
31 Nord de-l'Île-de-Montréal), Montréal, Québec, Canada  
32

33 <sup>i</sup>Department of Emergency Services and scientist, Clinical Epidemiology Unit, Sunnybrook Health  
34 Sciences, Ottawa Hospital Research Institute  
35  
36  
37  
38  
39

40 **Meeting:** Part of this study results have been presented at SAEM annual meeting, Orlando, Florida  
41 2017  
42

43 **Financial support:** This study was supported by the Sacré-Coeur Hospital's emergency medicine  
44 research fund.  
45

46 **Conflicts of interest:** There is no financial benefit or conflict of interest to report from all co-authors.  
47

48 **Author contributions:**

49 R.D. and J.M.C conceived the study and obtained research funding. All authors contributed to the final  
50 protocol and data interpretation. J.P. was responsible for data management and statistical analysis. R.D.  
51 drafted the manuscript, and A.L., E.P., J.M., S.G., M.E., G.L., J.L. contributed substantially to its  
52 revision. All authors approved the final manuscript as submitted and have agreed to be accountable for  
53 all aspects of the work.  
54  
55  
56  
57

1  
2 **Data sharing statement:** Original data set found in the manuscript is available upon request to the  
3 corresponding author.  
4

5 **Word count:** 2498.  
6

7  
8 **Keywords:** Opioids, Acute pain, Emergency department.  
9

10  
11  
12 **Corresponding author and request for reprints:**

13 Raoul Daoust, MD, MSc  
14 Corresponding Author  
15 Emergency Department  
16 Sacré-Coeur Hospital  
17 Phone: 514 338-2222 (7584)  
18 5400 Gouin Blvd. West  
19 Montreal (QC) Canada H4J 1C5  
20 Email: [raoul.daoust@videotron.ca](mailto:raoul.daoust@videotron.ca)  
21  
22  
23

24  
25 **Running head:** Opioid use after an ED visit for acute pain  
26  
27  
28  
29  
30  
31  
32  
33  
34  
35  
36  
37  
38  
39  
40  
41  
42  
43  
44  
45  
46  
47  
48  
49  
50  
51  
52  
53  
54  
55  
56  
57  
58  
59  
60

## ABSTRACT

**Objectives:** Some suggest that prescription opioid diversion is a significant contributor to the opioid misuse epidemic. We examined the quantity of opioids consumed by emergency department (ED) discharged patients after treatment for an acute pain condition, and the percentage of unused opioids available for potential misuse.

**Design:** Prospective cohort study.

**Setting:** Tertiary care trauma centre academic hospital.

**Participants:** A convenience sample of patients aged 18 years and older who visited the ED for an acute pain condition ( $\leq 2$  weeks) and were discharged with an opioid prescription. Patients completed a 14-day paper diary in which they list their daily pain medication use. To reduce lost to follow-up, two weeks post-ED visit, participants also responded to phone interview questions about their previous 14-day pain medication use.

**Outcomes:** Quantity of morphine 5 mg equivalent pills prescribed, consumed, and unused during a 14-day follow-up. Quantity of opioids to adequately supply 80% of patients was also calculated.

**Results:** Results for 627 patients were analyzed (mean age  $\pm$ SD: 51 $\pm$ 16 years, 48% women). Patients consumed a median of 7 morphine 5 mg equivalent (M5E) pills (Q1-Q3: 2–17). They were discharged from the ED with a median prescription of 30 M5E pills (Q1-Q3: 20–48), and 95% filled their prescription. For the whole sample, 32% of the total prescribed opioids were consumed, with 68% remaining unused. The quantity of opioids to adequately supply 80% of patients was 20 M5E pills.

**Conclusions:** Patients with an acute pain condition at ED discharge consumed less than 10 M5E pills in the following two weeks, leaving two-thirds of the prescription available for misuse. ED physicians should adapt their prescription practice to minimize unused opioids.

## STRENGTHS AND LIMITATIONS OF THIS STUDY

-First study to document opioids consumption after an acute pain emergency department visit.

-Use of a 14-day diary to document opioid consumption.

-Self-reported phone interview data was validated with the 14-day diary information.

-The convenience sample from one ED centre and the small sample size for less frequent pain conditions limit the generalization of our results.

## INTRODUCTION

In the 1990s, physicians, who were perceived as undertreating pain, changed their practice in order to identify and treat pain more effectively.<sup>1</sup> Consequently, emergency department (ED) opioid prescriptions increased significantly in the last two decades.<sup>2,3</sup> Meanwhile, opioid misuse (i.e., intentional use for nonmedical purposes), dependence, overdoses, and deaths have increased to epidemic proportions in both the US and Canada.<sup>4-12</sup>

Over 10 million Americans have misused opioids at some point in their life.<sup>13</sup> It is becoming increasingly clear that the availability of unused prescription opioids contributes to misuse.<sup>14</sup> For example, 71% of opioid abusers received them through the diversion of prescription opioids (i.e., transfer of opioids to someone other than the initial prescription holder), and in 55% of cases, these pills were the unused medications of friends or family members.<sup>13,15</sup>

Some US cities and states have formulated ED opioid prescribing guidelines<sup>16,17</sup> and developed prescription drug monitoring programs in hopes of preventing opioid abuse and deaths.<sup>18</sup> These recommendations can be summarized as follows: limit the prescription to a three-day supply (30 pills maximum), avoid prescribing long-acting opioids, and avoid refilling lost or stolen prescriptions.<sup>19</sup> However, these guidelines were not based on prospectively collected data, and possibly neglected patient-centered outcomes such as quantity of opioid needed for pain relief.

Prospective surgical studies have shown wide variation in the number of opioid pills prescribed for the same surgical procedure. Moreover, 58% to 92% of the prescribed opioids were unused,<sup>14,20-22</sup> and the majority (91%) were not properly stored or discarded,<sup>20</sup> leaving them accessible for potential misuse.<sup>23</sup> Studies on ED opioid prescriptions draw their data from large retrospective<sup>24,25</sup> administrative databases, and therefore cannot distinguish between acute and chronic pain in their patient populations. In addition, they are unable to determine whether or not (and how many) opioids were actually consumed.

1  
2 The main objective of this study was to determine the quantity of opioids consumed by ED-  
3  
4 patients discharged with an acute pain condition. Based on our pilot study,<sup>27</sup> we hypothesized that the  
5  
6 quantity of opioids that was consumed during the two weeks following an ED visit for acute pain  
7  
8 would be fewer than 10 pills of oral morphine 5 mg equivalent.  
9

## 10 11 **METHODS**

### 12 13 **Study design and setting**

14  
15 This prospective cohort study was conducted in the ED of a tertiary care level 1 trauma centre  
16  
17 academic hospital with an affiliated emergency medicine residency program and an annual census of  
18  
19 approximately 65,000 ED visits (mostly adults). Approval was obtained from the local institutional  
20  
21 ethics review board. Patients were informed that results of the study could be published and accessible  
22  
23 upon request.  
24  
25

### 26 27 **Selection of participants**

28  
29 Patients aged 18 years and older and treated in the ED from June 2016 to July 2017 were  
30  
31 recruited 24/7. We included patients with an acute pain condition present for less than two weeks and  
32  
33 discharged from ED with an opioid prescription. Patients with an opioid prescription were identified by  
34  
35 ED physicians and then recruited by research nurses. A convenience sample was used because we were  
36  
37 not able to determine the number of patients missed by ED physicians. We excluded patients who did  
38  
39 not speak French or English, were using opioid medication prior to the ED visit, stayed in the ED > 48  
40  
41 hours, or were suffering from cancer or chronic pain.  
42  
43  
44  
45

### 46 47 **Measurements**

48  
49 ED physicians obtained patients' consent to be contacted by the research nurses to explain the  
50  
51 study. The research nurses subsequently obtained informed consent. Patient demographic information,  
52  
53 pain intensity at triage, arrival mode, triage priority, and length of ED stay were extracted from our  
54  
55 computerized medical system. ED physicians entered the final diagnosis, pain intensity at discharge, and  
56  
57  
58  
59



1 which pain medications were prescribed. Patients also received a 14-day diary in which the patient  
2 recorded the quantity, the time and the name of all the pain medication consumed. Partly because of the  
3 low percentage of the diary returned in our pilot study, two weeks post-ED visit, patients responded to  
4 five brief questions over the phone concerning their pain medication use and current pain intensity.  
5 Patients were asked if they had filled their opioid prescription; the quantity of opioids, acetaminophen, or  
6 nonsteroidal anti-inflammatory drugs (NSAIDs) they had consumed; and whether they had received and  
7 filled any new opioid prescriptions in the last two weeks. Patients were asked to report their pain on a  
8 verbal 11-point numerical rating scale (NRS) ranging from 0 to 10, where 0 represents “no pain at all”  
9 and 10 represent “the worst imaginable pain.” The two-week follow-up period was chosen because acute  
10 pain usually lasts for a short time (days or a few weeks), during which most patients stop taking opioids  
11 (88% in our pilot study).<sup>26</sup> Study data were collected and managed using REDCap (Research Electronic  
12 Data Capture), a secure, web-based application tool hosted in the hospital.<sup>27</sup>

## 30 Outcomes

31 The main outcome of this study was the quantity of opioid pills consumed during the two-week  
32 follow-up period extracted from the paper diary or phone interview (if the diary was not returned). The  
33 quantity of opioid pills cannot be summed as it stands, due to the different potency of different opioids.  
34 In addition, dosages vary across opioid types. In order to compare the different opioid forms, each  
35 opioid prescription and consumption was transformed into an oral morphine 5 mg pill equivalent<sup>28 29</sup>  
36 (M5E), using Berdine and Nesbit's<sup>30</sup> method. A dosage of 3.33 mg of oxycodone and 1.25 mg of  
37 hydromorphone were considered equipotent to one M5E pill. The second outcome was the percentage  
38 of prescribed opioid pills that were unused after the two-week follow-up. The third outcome was  
39 determined as the number of M5E pills that would adequately supply 80% of patients. Although not  
40 supported by any consensus, the 80% threshold was used in a recent surgical study by Hill<sup>14</sup> and could  
41 provide a reasonable balance between sufficient pain treatments for a large majority of patients while  
42  
43  
44  
45  
46  
47  
48  
49  
50  
51  
52  
53  
54  
55  
56  
57

1  
2 limiting the quantity of unused opioids. To facilitate application of the optimal prescription quantities  
3  
4 in a clinical setting, each patient's M5E pill consumption was grouped into five-pill bins (0=0; 1 to  
5  
6 5=5, 6 to 10=10; up to a maximum number of M5E pills) before threshold calculations.  
7

8  
9 Because different pain diagnoses have different pain resolution patterns,<sup>31</sup> we expected the  
10  
11 quantity of opioids required to treat acute pain to vary across pain conditions. The most frequently  
12  
13 reported pain conditions encountered in the ED are musculoskeletal, fracture, renal colic, and  
14  
15 abdominal pain.<sup>25</sup> Our pilot data from HSCM show that 85% of patients receiving opioids had one of  
16  
17 these four pain conditions.<sup>26</sup> For a more pragmatic approach, we included a group of patients with all  
18  
19 other previously undefined pain conditions (e.g., abscess, burn, tooth pain). These five pain condition  
20  
21 categories served as stratification variables for our main outcomes.  
22  
23

## 24 25 **Analysis**

26  
27 The study sample size was estimated based on our pilot study, where we observed a  
28  
29 consumption of 8.8 opioid pills (SD=10) during a two-week follow-up.<sup>26</sup> To detect a significant  
30  
31 difference from the null hypothesis (<10) using a Wilcoxon test assuming non-parametric distribution,  
32  
33 we had to recruit at least 499 patients to achieve a power of at least 0.80 with an alpha of 0.05, and we  
34  
35 estimated that this would take one year to complete (PASS version 11.0; NCSS, LLC. Kaysville, Utah).  
36  
37  
38

39  
40 The concordance between the 14-day diary and phone interview on the quantity of M5E pills  
41  
42 consumed was assessed with intraclass correlation coefficient. The quantity of consumed pain  
43  
44 medication is presented as a median with first and third quartiles (Q1, Q3), since it was not normally  
45  
46 distributed. Mann–Whitney U tests were used to assess the effect of sex and age (<65 vs ≥65) on the  
47  
48 quantity of M5E pills consumed. Wilcoxon signed rank tests were performed to compare the quantity  
49  
50 of consumed M5E pills to the null hypothesis (<10 pills). The Kruskal–Wallis test was used to compare  
51  
52 the quantity of consumed M5E pills across pain conditions. Two-by-two comparisons of the quantity of  
53  
54 consumed M5E pills across pain conditions were made using Mann–Whitney U tests with Bonferroni  
55  
56  
57

1  
2 correction for multiple testing. Finally, one-way anova with Tukey-b post-hoc comparisons tests was  
3  
4 used to compare the percentage of unused opioids across pain conditions. Alpha level was set at 0.05,  
5  
6 and all statistics were performed using SPSS version 23 (IBM, Somers, NY).  
7

## 8 9 **RESULTS**

10  
11  
12 During our one-year recruitment period, a total of 1315 patients meeting the inclusion criteria  
13  
14 were initially contacted. Of these, 29% had exclusion criteria, 13% declined to participate, and 10%  
15  
16 could not be reached for the 14-day follow-up, leaving 627 participants (Figure 1). Non-participating  
17  
18 and included patients were similar on all baseline characteristics (Table 1). Patients' mean age was 51  
19  
20 ( $\pm 16$ ) years, 48% were female, and mean pain intensity at triage was 7.8, decreasing to 4.8 at ED  
21  
22 discharge. Intraclass correlation coefficient performed on opioids consumed was 0.72 (95%CI: 0.66-  
23  
24 0.77) between the 14-day diary and phone interview which is considered good concordance between  
25  
26 both measures.<sup>32</sup> Furthermore, the median number of M5E pills consumed was the same (6.7) for both  
27  
28 phone interview and the 14-day diary. Therefore, data from phone interview was used for patients with  
29  
30 missing the 14-day diary.  
31  
32  
33

34  
35  
36 Almost all patients filled their opioid prescription during the two-week follow-up period (95%).  
37  
38 The median quantity of prescribed M5E pills was 30 (Q1–Q3: 20–48), and similar across all pain  
39  
40 condition categories, varying from 24 to 34 M5E pills (Table 2). Variability in the consumed pain  
41  
42 medication for the “other” pain condition category was similar to that for the four more common pain  
43  
44 condition categories, suggesting that this patient group is comparable. The median quantity of  
45  
46 consumed M5E pills was low (7, Q1–Q3: 2–17) compared to the prescribed quantity, and differed  
47  
48 significantly from the null hypothesis ( $H_0: < 10$ ;  $p < 0.001$ ). The consumed quantity varied significantly  
49  
50 across pain condition categories: from 3 M5E pills for renal colic to 11 M5E pills for fracture  
51  
52 ( $p < 0.001$ ). Multiple comparisons showed that patients suffering from renal colic and abdominal pain  
53  
54 consumed fewer opioids than those suffering from musculoskeletal pain or fracture (all  $p < 0.05$ ). There  
55  
56  
57  
58  
59  
60

1  
2 was no significant effect of age (<65 vs ≥65) or sex on the quantity of consumed opioids during the  
3  
4 two-week follow-up (p>0.40 for both). Of the whole sample, 79% consumed opioids, 68% used  
5  
6 acetaminophen, and 45% used NSAIDs.  
7

8  
9 Over the course of this study, patients discharged from the ED were prescribed 23,402 M5E  
10  
11 pills, of which 7,353 were consumed during the two-week follow-up period, leaving a total of 16,049  
12  
13 (68%) unused M5E pills. The percentage of unused opioids showed significant differences across pain  
14  
15 conditions (p<0.01): renal colic (81%) and abdominal pain (78%) patients had a significant higher  
16  
17 percentage of unused opioids than patients suffering from musculoskeletal, fracture, or “other” pain  
18  
19 condition (62% when averaging the 3 categories; Figure 2).  
20  
21

22  
23 Patients’ pain intensity at two weeks was low (2.0 average) across all pain conditions. Only a  
24  
25 minority of patients (<7%) filled a supplemental opioid prescription, indicating that the initial  
26  
27 prescriptions were sufficient to treat pain for 93% of patients during the two-week period. The quantity  
28  
29 of M5E pills to prescribe in order to adequately supply 80% of all the patients was 20. Patients  
30  
31 suffering from renal colic or abdominal pain required only half the quantity compared to patients  
32  
33 suffering from fractures (Figure 3).  
34  
35

## 36 37 **DISCUSSION**

38  
39  
40 This prospective study showed that patients discharged from the ED with an acute pain  
41  
42 condition consumed a median of only 7 M5E pills but received a median of 30 M5E pills prescription,  
43  
44 leaving two-thirds of the opioids unused and available for misuse. Furthermore, patients with renal  
45  
46 colic or abdominal pain tended to consume fewer opioids during the two-week follow-up compared to  
47  
48 patients with musculoskeletal pain or fractures. We also determined that 20 M5E pills could adequately  
49  
50 supply 80% of patients while limiting the quantity of unused opioids.  
51  
52  
53  
54  
55  
56  
57  
58  
59  
60

1  
2 The number of opioids prescribed to patients discharged from the ED with a pain condition in  
3  
4 this study was similar to that reported for patients who had upper extremity surgery,<sup>21</sup> common general  
5  
6 surgical procedures,<sup>14</sup> and urological surgery.<sup>20</sup> This one-size-fits-all approach, which does not take  
7  
8 into account the patient's individual condition, can probably be attributed to the lack of clinical data on  
9  
10 opioid consumption.<sup>16 17</sup> During the two-week follow-up, our 68% of opioids left unused is also within  
11  
12 the range of percentages observed in surgical studies (58–92%).<sup>14 20-22</sup>. The purpose of this over-  
13  
14 prescribing may be to offset the inconvenience, for both patient and physician, of return visits to the  
15  
16 ED or another medical service to obtain another prescription.<sup>14</sup> However, these large quantities of  
17  
18 unused opioids can be diverted to family and friends, resulting in misuse, dependence, and possibly  
19  
20 death by overdose.<sup>20</sup>  
21  
22  
23  
24

25  
26 Patients suffering from renal colic and abdominal pain needed fewer opioids than those  
27  
28 suffering from a fracture or musculoskeletal pain. Rodgers et al. also reported differences in opioid  
29  
30 consumption between different types of surgery, finding that bone surgery required more opioids than  
31  
32 soft tissue procedures.<sup>21</sup> Furthermore, renal colic shows a unique pain resolution pattern: episodic  
33  
34 intense pain until the stone is expelled. These results underscore the need for practitioners to adjust  
35  
36 their opioid prescriptions to the type of pain condition. If patients in our study were prescribed opioids  
37  
38 in order to adequately supply 80% of the patients (20 M5E pills), a total of 10,492 (45%) pills would  
39  
40 not have been available for potential misuse. Since 7 M5E pills (median consumed) would adequately  
41  
42 supply 50% of patients, another way of limiting the quantity of unused opioids would require the  
43  
44 pharmacist to divide the opioid prescription into portions. Even if repeatable opioid prescriptions are  
45  
46 not allowed in most settings, physicians can prescribe a fixed quantity of opioids while instructing the  
47  
48 pharmacist to only supply a fraction at a time. For example a physician could prescribe 20 M5E pills  
49  
50 and ask the pharmacist to supply only 10 pills at a time with an expiration date of the prescription in  
51  
52 two weeks.  
53  
54  
55  
56  
57

1  
2 This trial has certain limitations. The convenience sample from one ED centre and the small  
3  
4 sample size for less frequent pain conditions (especially abdominal pain) limit the generalization of our  
5  
6 results. However, patients were recruited 24/7, and consecutive recruitment was limited only by the  
7  
8 fact that the investigators could not determine the number of patients missed by ED physicians, it also  
9  
10 would be surprising if patients consume opioids differently in other settings. Moreover, the reasons for  
11  
12 the participants to stop consuming opioids were not recorded. Some patients may have restricted their  
13  
14 opioid use due to adverse effects, fear of addiction, or fear of running out of pills, among others. There  
15  
16 is a need for a multi-centre prospective study with larger sample sizes for each pain condition, to  
17  
18 determine the impacts on the quantity of unused opioids and incidences of misuse, dependence, and  
19  
20 opioid overdose.  
21  
22  
23  
24  
25

26 In summary, patients who are discharged from the ED with an acute pain condition consumed a  
27  
28 median of fewer than 10 morphine 5 mg equivalent pills during the following two weeks, accounting  
29  
30 for only one-third of the prescribed opioids, leaving two-thirds of the opioids unused and available for  
31  
32 potential misuse. ED physicians should adapt their prescription practice to minimize unused opioids.  
33  
34  
35  
36  
37

### 38 **Acknowledgments**

39  
40 The authors would like to thank Martin Marquis and Margaret McKyes for their contributions  
41  
42 to manuscript revision.  
43  
44  
45  
46  
47  
48  
49  
50  
51  
52  
53  
54  
55  
56  
57  
58  
59  
60

**REFERENCES**

1. Perrone J, Nelson LS, Yealy DM. Choosing Analgesics Wisely: What We Know (and Still Need to Know) About Long-Term Consequences of Opioids. *Ann Emerg Med* 2015;**65**(5):500-2.
2. Gomes T, Mamdani MM, Paterson JM, et al. Trends in high-dose opioid prescribing in Canada. *Can Fam Physician* 2014;**60**(9):826-32.
3. Mazer-Amirshahi M, Mullins PM, Rasooly I, et al. Rising opioid prescribing in adult U.S. emergency department visits: 2001-2010. *Acad Emerg Med* 2014;**21**(3):236-43.
4. Cantrill SV, Brown MD, Carlisle RJ, et al. Clinical policy: critical issues in the prescribing of opioids for adult patients in the emergency department. *Ann Emerg Med* 2012;**60**(4):499-525.
5. Hasegawa K, Espinola JA, Brown DF, et al. Trends in U.S. emergency department visits for opioid overdose, 1993-2010. *Pain Med* 2014;**15**(10):1765-70.
6. CDC. Opioid overdoses in the United States. *J Pain Palliat Care Pharmacother* 2012;**26**(1):44-7.
7. Vital signs: overdoses of prescription opioid pain relievers---United States, 1999--2008. *MMWR Morb Mortal Wkly Rep* 2011;**60**(43):1487-92.
8. Dhalla IA, Mamdani MM, Sivilotti ML, et al. Prescribing of opioid analgesics and related mortality before and after the introduction of long-acting oxycodone. *Cmaj* 2009;**181**(12):891-6.
9. Beaudoin FL, Straube S, Lopez J, et al. Prescription opioid misuse among ED patients discharged with opioids. *Am J Emerg Med* 2014;**32**(6):580-5.
10. Wilsey BL, Fishman SM, Ogden C. Prescription opioid abuse in the emergency department. *J Law Med Ethics* 2005;**33**(4):770-82.
11. Fischer B, Argento E. Prescription opioid related misuse, harms, diversion and interventions in Canada: a review. *Pain Physician* 2012;**15**(3 Suppl):Es191-203.
12. Jones CM, Mack KA, Paulozzi LJ. Pharmaceutical overdose deaths, United States, 2010. *Jama* 2013;**309**(7):657-9.
13. Manchikanti L, Helm S, 2nd, Fellows B, et al. Opioid epidemic in the United States. *Pain Physician* 2012;**15**(3 Suppl):Es9-38.
14. Hill MV, McMahon ML, Stucke RS, et al. Wide Variation and Excessive Dosage of Opioid Prescriptions for Common General Surgical Procedures. *Ann Surg* 2017;**265**(4):709-14.
15. Maxwell JC. The prescription drug epidemic in the United States: a perfect storm. *Drug Alcohol Rev* 2011;**30**(3):264-70.
16. Neven DE, Sabel JC, Howell DN, et al. The development of the Washington State emergency department opioid prescribing guidelines. *J Med Toxicol* 2012;**8**(4):353-9.
17. Juurlink DN, Dhalla IA, Nelson LS. Improving opioid prescribing: the New York City recommendations. *JAMA* 2013;**309**(9):879-80.
18. Poon SJ, Greenwood-Ericksen MB. The opioid prescription epidemic and the role of emergency medicine. *Ann Emerg Med* 2014;**64**(5):490-5.
19. Weiner SG, Perrone J, Nelson LS. Centering the pendulum: the evolution of emergency medicine opioid prescribing guidelines. *Ann Emerg Med* 2013;**62**(3):241-3.
20. Bates C, Laciak R, Southwick A, et al. Overprescription of postoperative narcotics: a look at postoperative pain medication delivery, consumption and disposal in urological practice. *J Urol* 2011;**185**(2):551-5.
21. Rodgers J, Cunningham K, Fitzgerald K, et al. Opioid consumption following outpatient upper extremity surgery. *J Hand Surg Am* 2012;**37**(4):645-50.
22. Bicket MC, Long JJ, Pronovost PJ, et al. Prescription Opioid Analgesics Commonly Unused After Surgery: A Systematic Review. *JAMA Surg* 2017;**152**(11):1066-71.
23. Bartels K, Mayes LM, Dingmann C, et al. Opioid Use and Storage Patterns by Patients after Hospital Discharge following Surgery. *PLoS One* 2016;**11**(1):e0147972.

24. Alam A, Gomes T, Zheng H, et al. Long-term analgesic use after low-risk surgery: a retrospective cohort study. *Arch Intern Med* 2012;**172**(5):425-30.
25. Hoppe JA, Nelson LS, Perrone J, et al. Opioid Prescribing in a Cross Section of US Emergency Departments. *Ann Emerg Med* 2015;**66**(3):253-59.e1.
26. Quantity of opioid to prescribe for acute pain to limit misuse after emergency department discharge. *SAEM: Society for Academic Emergency Medicine*; 2017; Orlando; US.
27. Harris PA, Taylor R, Thielke R, et al. Research electronic data capture (REDCap) – A metadata-driven methodology and workflow process for providing translational research informatics support. *J Biomed Inform* 2009;**42**(2):377-81.
28. Daoust R, Paquet J, Lavigne G, et al. Impact of age, sex and route of administration on adverse events after opioid treatment in the emergency department: a retrospective study. *Pain Res Manag* 2015;**20**(1):23-8.
29. O'Neil JT, Wang ML, Kim N, et al. Prospective Evaluation of Opioid Consumption After Distal Radius Fracture Repair Surgery. *Am J Orthop (Belle Mead NJ)* 2017;**46**(1):E35-e40.
30. Berdine HJ, Nesbit SA. Equianalgesic dosing of opioids. *J Pain Palliat Care Pharmacother* 2006;**20**(4):79-84.
31. Chapman CR, Fosnocht D, Donaldson GW. Resolution of acute pain following discharge from the emergency department: the acute pain trajectory. *J Pain* 2012;**13**(3):235-41.
32. Cicchetti DV. Guidelines, criteria, and rules of thumb for evaluating normed and standardized assessment instruments in psychology. *Psychological Assessment* 1994;**6**(4):284-90.



1  
2 Figure legends  
3

4  
5 Figure 1. Flow chart of patients' enrollment in the study.  
6

7  
8 Figure 2. Percentage of morphine 5 mg equivalent pills that remained unused after the two-week  
9  
10 follow-up for each pain condition category. Mean  $\pm$  sem are reported. Brackets indicate the results of  
11  
12 the Tukey-b multiple comparisons tests. Renal colic and abdominal pain have higher percentage of  
13  
14 unused opioids than each of the three other pain conditions.  
15  
16

17  
18 Figure 3. Number of morphine 5 mg equivalent pills to prescribe to supply 80% of patients for each  
19  
20 pain condition category.  
21  
22

Table 1. Comparison of baseline characteristics between included and excluded (refused to participate or were lost to the 14-day follow-up) patients.

| Baseline characteristics                                     | Included<br>(N=627) | Excluded<br>(N=310) |
|--------------------------------------------------------------|---------------------|---------------------|
| Mean age ( $\pm$ SD)                                         | 51.0 (15.9)         | 50.0 (17.8)         |
| Female (%)                                                   | 47.8                | 49.0                |
| ED arrival mode (%)                                          |                     |                     |
| -By himself                                                  | 78.6                | 79.9                |
| -By ambulance                                                | 21.3                | 20.1                |
| High (level 1 or 2) triage priority (%)                      | 42.6                | 45.3                |
| Mean pain intensity (0-10 scale) at triage ( $\pm$ SD)       | 7.8 (2.0)           | 8.0 (1.7)           |
| ED treatment section (%)                                     |                     |                     |
| -Ambulatory                                                  | 64.6                | 64.1                |
| -On stretcher                                                | 35.4                | 35.9                |
| Type of pain conditions (%)                                  |                     |                     |
| -Musculoskeletal pain                                        | 44.0                | 40.3                |
| -Fracture                                                    | 19.1                | 19.7                |
| -Renal colic                                                 | 17.0                | 17.7                |
| -Abdominal pain                                              | 6.0                 | 5.2                 |
| -Other                                                       | 13.9                | 17.1                |
| Received a Tylenol prescription at ED discharged (%)         | 71.6                | 70.3                |
| Received a NSAIDs prescription at ED discharged (%)          | 45.8                | 47.4                |
| Opioid prescription type (%)                                 |                     |                     |
| -Morphine                                                    | 43.6                | 42.7                |
| -Oxycodone                                                   | 40.5                | 36.9                |
| -Hydromorphone                                               | 15.9                | 20.4                |
| Median (Q1-Q3) morphine 5 mg equivalent pills prescription   | 30 (20-48)          | 30 (20-45)          |
| Median (Q1-Q3) ED stay (hours)                               | 5.3 (3.6-7.7)       | 5.2 (3.7-7.9)       |
| Mean ( $\pm$ SD) pain intensity (0-10 scale) at ED discharge | 4.8 (2.9)           | 4.7 (2.9)           |

Q1-Q3: first and third quartile; NSAIDs: nonsteroidal anti-inflammatory drug

Table 2. Pain intensity and pain medication for each pain condition during the two-week follow-up.

| Variables                                              | Musculo-skeletal | Fracture   | Renal colic | Abdominal  | Other      | Total      |
|--------------------------------------------------------|------------------|------------|-------------|------------|------------|------------|
| Number of patients                                     | 280              | 119        | 106         | 37         | 85         | 627        |
| Mean ( $\pm$ SD) pain intensity at ED discharged       | 5.6 (2.4)        | 5.2 (2.6)  | 1.9 (2.7)   | 3.7 (3.2)  | 5.5 (3.0)  | 4.8 (2.9)  |
| Mean ( $\pm$ SD) pain intensity at two-week            | 2.6 (2.7)        | 2.6 (2.9)  | 0.5 (1.2)   | 1.6 (2.8)  | 1.8 (2.6)  | 2.0 (2.6)  |
| Filled opioid prescription (%)                         | 95.1             | 90.4       | 99.0        | 97.1       | 91.4       | 94.5       |
| Patients who filled another opioid prescription (n, %) | 22 (7.9)         | 10 (8.4)   | 3 (2.8)     | 2 (5.4)    | 5 (5.9)    | 42 (6.7)   |
| Median (Q1-Q3) number of M5E prescribed                | 30 (20-48)       | 34 (30-60) | 31 (23-48)  | 30 (17-36) | 24 (16-42) | 30 (20-48) |
| Median (Q1-Q3) number of M5E consumed                  | 8 (3-20)         | 11 (3-23)  | 3 (0-10)    | 3 (1-9)    | 6 (2-16)   | 7 (2-17)   |
| Received acetaminophen prescription at discharged (%)  | 78.2             | 79.0       | 57.5        | 56.8       | 63.5       | 71.6       |
| Consumed acetaminophen (%)                             | 73.9             | 87.4       | 49.1        | 48.6       | 52.9       | 67.9       |
| Received NSAIDs prescription at discharged (%)         | 49.3             | 28.6       | 64.2        | 40.5       | 37.6       | 45.8       |
| Consumed NSAIDs (%)                                    | 51.8             | 35.3       | 50.9        | 35.1       | 34.1       | 45.1       |

Q1-Q3: first and third quartile; M5E: 5 mg morphine pills equivalent; NSAIDs: nonsteroidal anti-inflammatory drugs

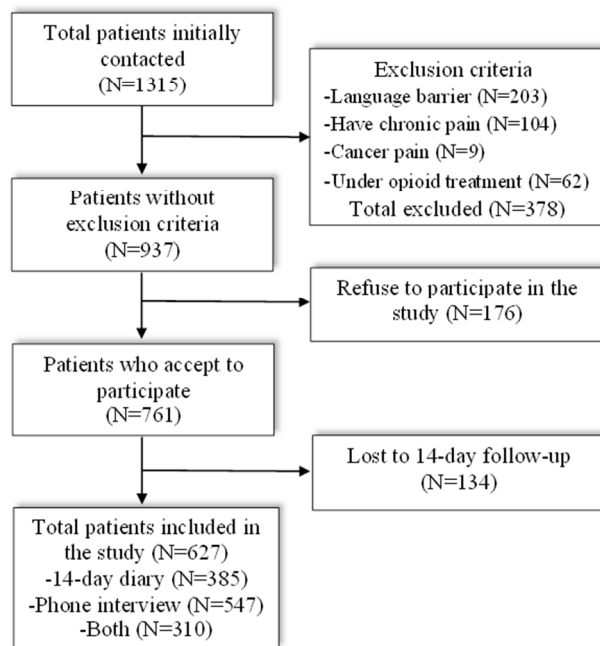

Figure 1. Flow chart of patients' enrollment in the study.

254x190mm (96 x 96 DPI)

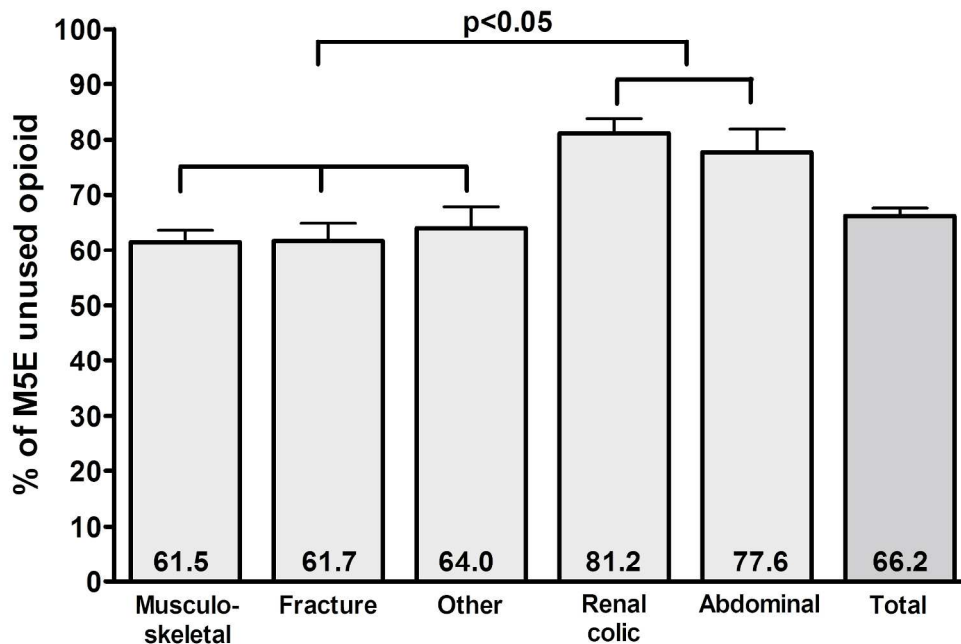

Figure 2. Percentage of morphine 5 mg equivalent pills that remained unused after the two-week follow-up for each pain condition category. Mean  $\pm$  sem are reported. Brackets indicate the results of the Tukey-b multiple comparisons tests. Renal colic and abdominal pain have higher percentage of unused opioids than each of the three other pain conditions.

230x169mm (300 x 300 DPI)

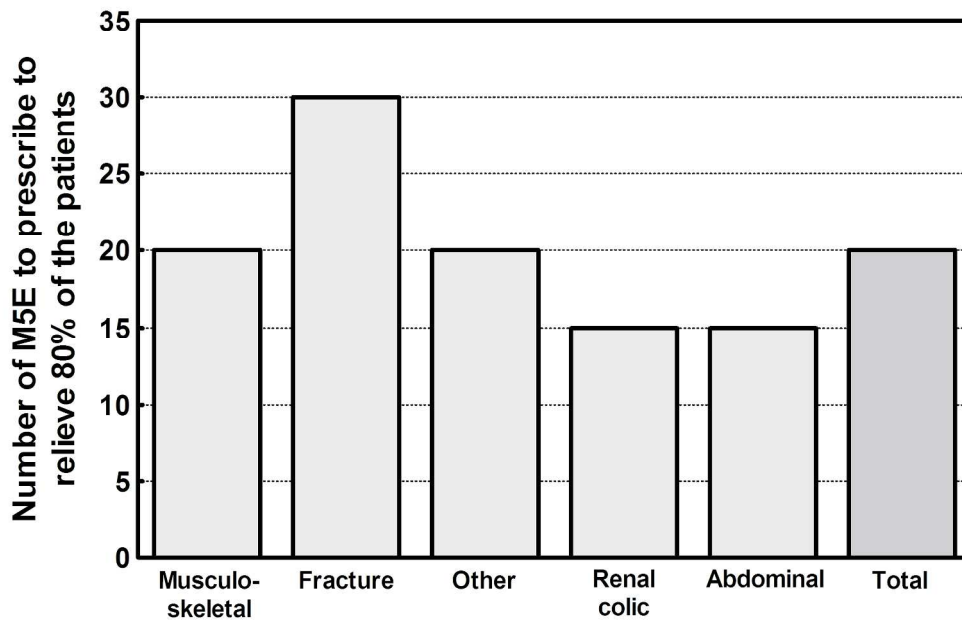

Figure 3. Number of morphine 5 mg equivalent pills to prescribe to supply 80% of patients for each pain condition category.

237x169mm (300 x 300 DPI)

## STROBE Statement—checklist of items that should be included in reports of observational studies

|                              | Item No | Recommendation                                                                                                                                                                                                                                                                                                                                                                                                                                                                                                                                                                                                                                                                                             |
|------------------------------|---------|------------------------------------------------------------------------------------------------------------------------------------------------------------------------------------------------------------------------------------------------------------------------------------------------------------------------------------------------------------------------------------------------------------------------------------------------------------------------------------------------------------------------------------------------------------------------------------------------------------------------------------------------------------------------------------------------------------|
| <b>Title and abstract</b>    | 1       | (a) Indicate the study's design with a commonly used term in the title or the abstract<br>Page 1<br>(b) Provide in the abstract an informative and balanced summary of what was done and what was found<br>Page 3                                                                                                                                                                                                                                                                                                                                                                                                                                                                                          |
| <b>Introduction</b>          |         |                                                                                                                                                                                                                                                                                                                                                                                                                                                                                                                                                                                                                                                                                                            |
| Background/rationale         | 2       | Explain the scientific background and rationale for the investigation being reported<br>Page 5                                                                                                                                                                                                                                                                                                                                                                                                                                                                                                                                                                                                             |
| Objectives                   | 3       | State specific objectives, including any prespecified hypotheses<br>Page 6                                                                                                                                                                                                                                                                                                                                                                                                                                                                                                                                                                                                                                 |
| <b>Methods</b>               |         |                                                                                                                                                                                                                                                                                                                                                                                                                                                                                                                                                                                                                                                                                                            |
| Study design                 | 4       | Present key elements of study design early in the paper<br>Page 6                                                                                                                                                                                                                                                                                                                                                                                                                                                                                                                                                                                                                                          |
| Setting                      | 5       | Describe the setting, locations, and relevant dates, including periods of recruitment, exposure, follow-up, and data collection<br>Page 6                                                                                                                                                                                                                                                                                                                                                                                                                                                                                                                                                                  |
| Participants                 | 6       | (a) <i>Cohort study</i> —Give the eligibility criteria, and the sources and methods of selection of participants. Describe methods of follow-up<br>Page 6<br><i>Case-control study</i> —Give the eligibility criteria, and the sources and methods of case ascertainment and control selection. Give the rationale for the choice of cases and controls<br><i>Cross-sectional study</i> —Give the eligibility criteria, and the sources and methods of selection of participants<br>(b) <i>Cohort study</i> —For matched studies, give matching criteria and number of exposed and unexposed<br><i>Case-control study</i> —For matched studies, give matching criteria and the number of controls per case |
| Variables                    | 7       | Clearly define all outcomes, exposures, predictors, potential confounders, and effect modifiers. Give diagnostic criteria, if applicable<br>Page 7                                                                                                                                                                                                                                                                                                                                                                                                                                                                                                                                                         |
| Data sources/<br>measurement | 8*      | For each variable of interest, give sources of data and details of methods of assessment (measurement). Describe comparability of assessment methods if there is more than one group<br>Page 6                                                                                                                                                                                                                                                                                                                                                                                                                                                                                                             |
| Bias                         | 9       | Describe any efforts to address potential sources of bias<br>Page 8                                                                                                                                                                                                                                                                                                                                                                                                                                                                                                                                                                                                                                        |
| Study size                   | 10      | Explain how the study size was arrived at<br>Page 8                                                                                                                                                                                                                                                                                                                                                                                                                                                                                                                                                                                                                                                        |
| Quantitative variables       | 11      | Explain how quantitative variables were handled in the analyses. If applicable, describe which groupings were chosen and why<br>Page 8                                                                                                                                                                                                                                                                                                                                                                                                                                                                                                                                                                     |
| Statistical methods          | 12      | (a) Describe all statistical methods, including those used to control for confounding                                                                                                                                                                                                                                                                                                                                                                                                                                                                                                                                                                                                                      |

1  
2 Page 8

---

3 (b) Describe any methods used to examine subgroups and interactions

4 Page 8

---

5 (c) Explain how missing data were addressed

6 Page 9

---

7 (d) *Cohort study*—If applicable, explain how loss to follow-up was addressed

8 Page 9

9 *Case-control study*—If applicable, explain how matching of cases and controls was  
10 addressed

11 *Cross-sectional study*—If applicable, describe analytical methods taking account of  
12 sampling strategy

---

13 (e) Describe any sensitivity analyses

14 No sensitivity analysis

15  
16 Continued on next page

17  
18  
19  
20  
21  
22  
23  
24  
25  
26  
27  
28  
29  
30  
31  
32  
33  
34  
35  
36  
37  
38  
39  
40  
41  
42  
43  
44  
45  
46  
47  
48  
49  
50  
51  
52  
53  
54  
55  
56  
57  
58  
59  
60

For peer review only



1  
2  
3  
4  
5  
6  
7  
8  
9  
10  
11  
12  
13  
14  
15  
16  
17  
18  
19  
20  
21  
22  
23  
24  
25  
26  
27  
28  
29  
30  
31  
32  
33  
34  
35  
36  
37  
38  
39  
40  
41  
42  
43  
44  
45  
46  
47  
48  
49  
50  
51  
52  
53  
54  
55  
56  
57  
58  
59  
60

## Results

|                          |     |                                                                                                                                                                                                                         |
|--------------------------|-----|-------------------------------------------------------------------------------------------------------------------------------------------------------------------------------------------------------------------------|
| Participants             | 13* | (a) Report numbers of individuals at each stage of study—eg numbers potentially eligible, examined for eligibility, confirmed eligible, included in the study, completing follow-up, and analysed<br>Page 9             |
|                          |     | (b) Give reasons for non-participation at each stage<br>Page 9                                                                                                                                                          |
|                          |     | (c) Consider use of a flow diagram<br>Page 9                                                                                                                                                                            |
| Descriptive data         | 14* | (a) Give characteristics of study participants (eg demographic, clinical, social) and information on exposures and potential confounders<br>Page 9                                                                      |
|                          |     | (b) Indicate number of participants with missing data for each variable of interest                                                                                                                                     |
|                          |     | (c) <i>Cohort study</i> —Summarise follow-up time (eg, average and total amount)<br>Page 9                                                                                                                              |
| Outcome data             | 15* | <i>Cohort study</i> —Report numbers of outcome events or summary measures over time<br>Page 10                                                                                                                          |
|                          |     | <i>Case-control study</i> —Report numbers in each exposure category, or summary measures of exposure                                                                                                                    |
|                          |     | <i>Cross-sectional study</i> —Report numbers of outcome events or summary measures                                                                                                                                      |
| Main results             | 16  | (a) Give unadjusted estimates and, if applicable, confounder-adjusted estimates and their precision (eg, 95% confidence interval). Make clear which confounders were adjusted for and why they were included<br>Page 10 |
|                          |     | (b) Report category boundaries when continuous variables were categorized                                                                                                                                               |
|                          |     | (c) If relevant, consider translating estimates of relative risk into absolute risk for a meaningful time period                                                                                                        |
| Other analyses           | 17  | Report other analyses done—eg analyses of subgroups and interactions, and sensitivity analyses                                                                                                                          |
| <b>Discussion</b>        |     |                                                                                                                                                                                                                         |
| Key results              | 18  | Summarise key results with reference to study objectives<br>Page 10                                                                                                                                                     |
| Limitations              | 19  | Discuss limitations of the study, taking into account sources of potential bias or imprecision.<br>Page 12<br>Discuss both direction and magnitude of any potential bias<br>Page 12                                     |
| Interpretation           | 20  | Give a cautious overall interpretation of results considering objectives, limitations, multiplicity of analyses, results from similar studies, and other relevant evidence<br>Page 11                                   |
| Generalisability         | 21  | Discuss the generalisability (external validity) of the study results<br>Page 12                                                                                                                                        |
| <b>Other information</b> |     |                                                                                                                                                                                                                         |
| Funding                  | 22  | Give the source of funding and the role of the funders for the present study and, if applicable, for the original study on which the present article is based<br>Page 1                                                 |

1  
2 \*Give information separately for cases and controls in case-control studies and, if applicable, for exposed and  
3 unexposed groups in cohort and cross-sectional studies.  
4

5 **Note:** An Explanation and Elaboration article discusses each checklist item and gives methodological background and  
6 published examples of transparent reporting. The STROBE checklist is best used in conjunction with this article (freely  
7 available on the Web sites of PLoS Medicine at <http://www.plosmedicine.org/>, Annals of Internal Medicine at  
8 <http://www.annals.org/>, and Epidemiology at <http://www.epidem.com/>). Information on the STROBE Initiative is  
9 available at [www.strobe-statement.org](http://www.strobe-statement.org).  
10  
11  
12  
13  
14  
15  
16  
17  
18  
19  
20  
21  
22  
23  
24  
25  
26  
27  
28  
29  
30  
31  
32  
33  
34  
35  
36  
37  
38  
39  
40  
41  
42  
43  
44  
45  
46  
47  
48  
49  
50  
51  
52  
53  
54  
55  
56  
57  
58  
59  
60

# BMJ Open

## Quantity of opioids consumed following an emergency department visit for acute pain: a Canadian prospective cohort study.

|                                 |                                                                                                                                                                                                                                                                                                                                                                                                                                                                                                                                                                                                                                                                                                                                                                                      |
|---------------------------------|--------------------------------------------------------------------------------------------------------------------------------------------------------------------------------------------------------------------------------------------------------------------------------------------------------------------------------------------------------------------------------------------------------------------------------------------------------------------------------------------------------------------------------------------------------------------------------------------------------------------------------------------------------------------------------------------------------------------------------------------------------------------------------------|
| Journal:                        | <i>BMJ Open</i>                                                                                                                                                                                                                                                                                                                                                                                                                                                                                                                                                                                                                                                                                                                                                                      |
| Manuscript ID                   | bmjopen-2018-022649.R1                                                                                                                                                                                                                                                                                                                                                                                                                                                                                                                                                                                                                                                                                                                                                               |
| Article Type:                   | Research                                                                                                                                                                                                                                                                                                                                                                                                                                                                                                                                                                                                                                                                                                                                                                             |
| Date Submitted by the Author:   | 13-Jun-2018                                                                                                                                                                                                                                                                                                                                                                                                                                                                                                                                                                                                                                                                                                                                                                          |
| Complete List of Authors:       | Daoust, Raoul; Hôpital Sacré-Coeur de Montréal, Emergency<br>Paquet, Jean; Hôpital Sacré-Coeur de Montréal, Emergency<br>Cournoyer, Alexis; Université de Montréal Faculté de médecine, ; Hôpital du Sacre-Coeur de Montreal, Department of Emergency Medicine<br>Piette, Éric; Hôpital Sacré-Coeur de Montréal, Emergency<br>Morris, Judy; HSCM, Emergency Medicine<br>Gosselin, Sophie; McGill University Health Centre, Department of Medicine and Emergency Medicine<br>Émond, Marcel; Université Laval Faculté de médecine, Département de médecine d'urgence et famille<br>Lavigne, Gilles; Université de Montréal, Médecine dentaire<br>Lee, Jacques; University of Toronto, Clinical Epidemiology Unit<br>Chauny, Jean-Marc; Centre de recherche de l'Hôpital du Sacré-Cœur, |
| <b>Primary Subject Heading</b>: | Emergency medicine                                                                                                                                                                                                                                                                                                                                                                                                                                                                                                                                                                                                                                                                                                                                                                   |
| Secondary Subject Heading:      | Pharmacology and therapeutics, Addiction                                                                                                                                                                                                                                                                                                                                                                                                                                                                                                                                                                                                                                                                                                                                             |
| Keywords:                       | ACCIDENT & EMERGENCY MEDICINE, PAIN MANAGEMENT, Substance misuse < PSYCHIATRY, Opioids, Acute pain, Emergency department                                                                                                                                                                                                                                                                                                                                                                                                                                                                                                                                                                                                                                                             |
|                                 |                                                                                                                                                                                                                                                                                                                                                                                                                                                                                                                                                                                                                                                                                                                                                                                      |

SCHOLARONE™  
Manuscripts

1  
2 **Quantity of opioids consumed following an emergency department visit for acute pain: a**  
3 **Canadian prospective cohort study.**  
4

5 Raoul Daoust,<sup>a,b</sup> MD, MSc, Jean Paquet,<sup>a</sup> PhD, Alexis Cournoyer,<sup>a,b</sup> MD, Éric Piette,<sup>a,b</sup> MD, MSc,  
6 Judy Morris,<sup>a,b</sup> MD, MSc, Sophie Gosselin,<sup>e</sup> MD, Marcel Émond,<sup>c,d</sup> MD, MSc, Gilles Lavigne,<sup>g,h</sup>  
7 DMD, PhD, Jacques Lee,<sup>i</sup> MD, Jean-Marc Chauny,<sup>a,b</sup> MD, MSc  
8  
9

10  
11 <sup>a</sup>Department of Emergency Medicine, Research Centre, CIUSSS-Nord-de-l'Île de-Montréal, Sacré-  
12 Coeur Hospital, Montréal, Québec, Canada  
13

14 <sup>b</sup>Département Médecine Familiale et Médecine d'Urgence, Faculté de Médecine, Université de  
15 Montréal, Montréal, Québec, Canada  
16

17 <sup>c</sup>Département de médecine d'urgence et famille, Faculté de médecine, Université Laval, Québec,  
18 Canada  
19

20 <sup>d</sup>Département d'urgence du CHU-Québec, Québec, Canada  
21

22 <sup>e</sup>Department of Emergency Medicine, McGill University Health Centre, McGill University, Montreal,  
23 Québec, Canada  
24

25 <sup>f</sup>Trauma, Research Centre, CIUSSS-Nord-de-l'Île de-Montréal, Sacré-Coeur Hospital, Montréal,  
26 Québec, Canada  
27

28 <sup>g</sup>Faculties of Dental Medicine and Medicine, Université de Montréal, Montréal, Québec, Canada  
29

30 <sup>h</sup>Centre for Advanced Research in Sleep Medicine, Hôpital du Sacré-Coeur de Montréal (CIUSSS du  
31 Nord de-l'Île-de-Montréal), Montréal, Québec, Canada  
32

33 <sup>i</sup>Department of Emergency Services and scientist, Clinical Epidemiology Unit, Sunnybrook Health  
34 Sciences, Ottawa Hospital Research Institute  
35  
36  
37

38  
39  
40 **Meeting:** Part of this study results have been presented at SAEM annual meeting, Orlando, Florida  
41 2017  
42

43 **Financial support:** This study was supported by the Sacré-Coeur Hospital's emergency medicine  
44 research fund.  
45

46 **Conflicts of interest:** There is no financial benefit or conflict of interest to report from all co-authors.  
47

48 **Author contributions:**

49 R.D. and J.M.C conceived the study and obtained research funding. All authors contributed to the final  
50 protocol and data interpretation. J.P. was responsible for data management and statistical analysis. R.D.  
51 drafted the manuscript, and A. C., E.P., J.M., S.G., M.E., G.L., J.L. contributed substantially to its  
52 revision. All authors approved the final manuscript as submitted and have agreed to be accountable for  
53 all aspects of the work.  
54  
55  
56  
57

1  
2 **Data sharing statement:** Original data set found in the manuscript is available upon request to the  
3 corresponding author.  
4

5 **Word count:** 2498.  
6

7  
8 **Keywords:** Opioids, Acute pain, Emergency department.  
9

10  
11  
12 **Corresponding author and request for reprints:**

13 Raoul Daoust, MD, MSc  
14 Corresponding Author  
15 Emergency Department  
16 Sacré-Coeur Hospital  
17 Phone: 514 338-2222 (7584)  
18 5400 Gouin Blvd. West  
19 Montreal (QC) Canada H4J 1C5  
20 Email: [raoul.daoust@videotron.ca](mailto:raoul.daoust@videotron.ca)  
21  
22  
23

24  
25 **Running head:** Opioid use after an ED visit for acute pain  
26  
27  
28  
29  
30  
31  
32  
33  
34  
35  
36  
37  
38  
39  
40  
41  
42  
43  
44  
45  
46  
47  
48  
49  
50  
51  
52  
53  
54  
55  
56  
57  
58  
59  
60

## ABSTRACT

**Objectives:** Prescription opioid diversion is a significant contributor to the opioid misuse epidemic.

We examined the quantity of opioids consumed by emergency department (ED) discharged patients after treatment for an acute pain condition (musculoskeletal, fracture, renal colic, abdominal pain, and other), and the percentage of unused opioids available for potential misuse.

**Design:** Prospective cohort study.

**Setting:** Tertiary care trauma centre academic hospital.

**Participants:** A convenience sample of patients  $\geq 18$  years who visited the ED for an acute pain condition ( $\leq 2$  weeks) and were discharged with an opioid prescription. Patients completed a 14-day paper diary of daily pain medication use. To reduce lost to follow-up, participants also responded to standardized phone interview questions about their previous 14-day pain medication use.

**Outcomes:** Quantity of morphine 5 mg tablets (or equivalent) prescribed, consumed, and unused during a 14-day follow-up. Quantity of opioids to adequately supply 80% of patients for 2 weeks and 95% of patients for the first 3 days was also calculated.

**Results:** Results for 627 patients were analyzed (mean age  $\pm$ SD: 51 $\pm$ 16 years, 48% women). Patients consumed a median of 7 tablets of morphine 5 mg (32% of the total prescribed opioids). The quantity of opioids to adequately supply 80% of patients for 2 weeks was 20 tablets of morphine 5 mg for musculoskeletal pain, 30 for fracture, 15 for renal colic or abdominal pain, and 20 for other pain conditions. The quantity to adequately supply 95% of patients for the first three days was 15 tablets of morphine 5 mg.

**Conclusions:** Patients discharged from the ED with an acute pain condition consumed a median of fewer than 10 tablets of morphine 5 mg (or equivalent). ED physicians should consider prescribing a smaller quantity of opioids and asking the pharmacist to dispense them in portions to minimize unused opioids.

## STRENGTHS AND LIMITATIONS OF THIS STUDY

-First large study to prospectively document opioids consumption after an acute pain emergency department visit.

-Use of a 14-day daily diary to document opioid consumption.

- Opioid consumption data from a diary or phone interview could be biased by self-report

-The convenience sample from one ED centre and the small sample size for less frequent pain conditions limit the generalization of our results.

## INTRODUCTION

In the 1990s, physicians, who were perceived as undertreating pain, changed their practice in order to identify and treat pain more effectively.<sup>1</sup> Consequently, emergency department (ED) opioid prescriptions increased significantly in the last two decades.<sup>2,3</sup> Meanwhile, opioid misuse (i.e., intentional use for nonmedical purposes), dependence, overdoses, and deaths have increased to epidemic proportions in both the US and Canada.<sup>4-12</sup>

Over 10 million US citizens have misused opioids at some point in their life<sup>13</sup> and 82,000 Canadians (0.3% of the total population) a non-medical use of prescription opioids in 2015.<sup>14</sup> It is becoming increasingly clear that the availability of unused prescription opioids contributes to misuse.<sup>15</sup> For example, 71% of opioid abusers received them through the diversion of prescription opioids (i.e., transfer of opioids to someone other than the initial prescription holder), and in 55% of cases, these tablets were the unused medications of friends or family members.<sup>13,16</sup>

Some US cities and states have formulated ED opioid prescribing guidelines<sup>17,18</sup> and developed prescription drug monitoring programs in hopes of preventing opioid abuse and deaths.<sup>19</sup> These recommendations can be summarized as follows: limit the prescription to a three-day supply (30 tablets maximum), avoid prescribing long-acting opioids, and avoid refilling lost or stolen prescriptions.<sup>20</sup> However, these guidelines were not based on prospectively collected data, and possibly neglected patient-centered outcomes such as quantity of opioids needed for pain relief.

Prospective surgical studies have shown wide variation in the number of opioid tablets prescribed for the same surgical procedure. Moreover, 58% to 92% of the prescribed opioids were unused,<sup>15,21-23</sup> and the majority (91%) were not properly stored or discarded,<sup>21</sup> leaving them accessible for potential misuse.<sup>24</sup> Studies on ED opioid prescriptions draw their data from large retrospective<sup>25,26</sup> administrative databases, and therefore cannot distinguish between acute and chronic pain in their



1 patient populations. In addition, they were unable to determine whether or not (and how many) opioids  
2 were actually consumed.  
3  
4  
5

6 The main objective of this study was to determine the quantity of opioids consumed by ED-  
7 patients discharged with an acute pain condition. Based on our pilot study,<sup>27</sup> we hypothesized that the  
8 quantity of opioids that was consumed during the two weeks following an ED visit for acute pain  
9 would be fewer than 10 tablets of morphine 5 mg (or equivalent).  
10  
11  
12  
13  
14  
15

## 16 **METHODS**

### 17 **Patient and public involvement**

18 This research originated from the rising death toll from opioids overdose. However, patients or  
19 public were not involved in the design or conduct of the study.  
20  
21  
22  
23  
24  
25  
26  
27  
28

### 29 **Study design and setting**

30 This prospective cohort study was conducted in the ED of a tertiary care level 1 trauma centre  
31 academic hospital with an affiliated emergency medicine residency program and an annual census of  
32 approximately 65,000 ED visits (mostly adults). Approval was obtained from the local institutional  
33 ethics review board. Patients were informed that results of the study could be published and accessible  
34 upon request.  
35  
36  
37  
38  
39  
40  
41  
42

### 43 **Selection of participants**

44 Patients aged 18 years and older and treated in the ED from June 2016 to July 2017 were  
45 identified by ED physicians 24/7 and then recruited by research nurses. We included patients with an  
46 acute pain condition present for less than two weeks and discharged from ED with an opioid  
47 prescription. A convenience sample was used because we were not able to reliably determine the  
48 number of patients missed by ED physicians. We excluded patients who did not speak French or  
49  
50  
51  
52  
53  
54  
55  
56  
57

English, were using opioid medication prior to the ED visit, stayed in the ED > 48 hours, or were suffering from cancer or chronic pain.

## Measurements

ED physicians obtained patients' consent to be contacted by the research nurses to explain the study. The research nurses subsequently obtained informed consent. Patient demographic information, pain intensity at triage, arrival mode, triage priority, and length of ED stay were extracted from our computerized medical system. ED physicians entered the final diagnosis, pain intensity at discharge, and which pain medications were prescribed. Patients also received a 14-day diary in which the patient recorded for each day the quantity, the time and the name of all the pain medication consumed. Using pre-addressed and pre-stamped envelopes, these diaries were mailed back after completion. Partly because of the low percentage of the diary returned in our pilot study, two weeks post-ED visit, all patients responded were also interviewed over the phone by a research assistant and responded to five brief questions concerning their pain medication use and current pain intensity. Patients were asked if they had filled their opioid prescription; the quantity of opioids, acetaminophen, or nonsteroidal anti-inflammatory drugs (NSAIDs) they had consumed; and whether they had received and filled any new opioid prescriptions in the last two weeks. Patients were asked to report their pain on a verbal 11-point numerical rating scale (NRS) ranging from 0 to 10, where 0 represents "no pain at all" and 10 represent "the worst imaginable pain." The two-week follow-up period was chosen because acute pain usually lasts for a short time (days or a few weeks), during which most patients stop taking opioids (88% in our pilot study).<sup>27</sup> Study data were collected and managed using REDCap (Research Electronic Data Capture), a secure, web-based application tool hosted in the hospital.<sup>28</sup>

## Stratification

Because different pain diagnoses have different pain resolution patterns,<sup>29</sup> we expected the quantity of opioids required to treat acute pain to vary across pain conditions. The most frequently reported ED pain

1  
2 conditions in the literature and in our pilot study were musculoskeletal, fracture, renal colic, and  
3  
4 abdominal pain.<sup>26</sup> Our pilot data also showed that 85% of patients receiving opioids had one of these  
5  
6 four pain conditions.<sup>27</sup> For a more pragmatic approach, we included a group of patients with all other  
7  
8 uncategorized pain conditions (e.g., abscess, burn, tooth pain). These five pain condition categories  
9  
10 served as stratification variables for our main outcomes  
11  
12

### 13 **Outcomes**

14  
15 The main outcome of this study was the quantity of opioid tablets consumed during the two-  
16  
17 week follow-up period extracted from the paper diary or phone interview (if the diary was not  
18  
19 returned). The quantity of opioid tablets cannot be summed as it stands, due to the different potency of  
20  
21 different opioids. In addition, dosages vary across opioid types. In order to compare the different opioid  
22  
23 forms, each opioid prescription and consumption was transformed into tablets of morphine 5 mg  
24  
25 equivalent<sup>29 30</sup>, using Berdine and Nesbit's<sup>31</sup> method. A dosage of 3.33 mg of oxycodone and 1.25 mg  
26  
27 of hydromorphone were considered equipotent to one morphine 5 mg tablet. The second outcome was  
28  
29 the percentage of prescribed opioid tablets that were unused after the two-week follow-up. The third  
30  
31 outcome was determined as the number of morphine 5 mg tablets (or equivalent) that would adequately  
32  
33 supply for two weeks 80% of patients. Although not supported by any consensus, the 80% threshold  
34  
35 was used in a recent surgical study by Hill<sup>15</sup> and could provide a reasonable balance between sufficient  
36  
37 pain treatments for a large majority of patients while limiting the quantity of unused opioids. Since  
38  
39 some US cities and states have formulated ED opioid prescribing recommendations to limit the  
40  
41 prescription to a three-day supply (30 tablets maximum), we extracted from the 14-day diary the  
42  
43 quantity of morphine 5 mg tablets (or equivalent) to adequately supply 95% of patients during the first  
44  
45 three days after ED discharge. To facilitate application of the optimal prescription quantities in a  
46  
47 clinical setting, each patient's morphine 5 mg tablets (or equivalent) consumption was grouped into  
48  
49  
50  
51  
52  
53  
54  
55  
56  
57  
58  
59  
60

1  
2 five-tablet bins (0=0; 1 to 5=5, 6 to 10=10; up to a maximum number of five tablets) before threshold  
3  
4 calculations.  
5

6 Because different pain diagnoses have different pain resolution patterns,<sup>32</sup> we expected the  
7  
8 quantity of opioids required to treat acute pain to vary across pain conditions. The most frequently  
9  
10 reported pain conditions encountered in the ED are musculoskeletal, fracture, renal colic, and  
11  
12 abdominal pain.<sup>26</sup> Our pilot data from HSCM show that 85% of patients receiving opioids had one of  
13  
14 these four pain conditions.<sup>27</sup> For a more pragmatic approach, we included a group of patients with all  
15  
16 other previously undefined pain conditions (e.g., abscess, burn, tooth pain). These five pain condition  
17  
18 categories served as stratification variables for our main outcomes.  
19  
20  
21  
22

### 23 **Analysis**

24  
25 The study sample size was estimated based on our pilot study, where we observed a  
26  
27 consumption of 8.8 opioid tablets (SD=10) during a two-week follow-up.<sup>27</sup> To detect a significant  
28  
29 difference from the null hypothesis ( $H_0=10$ ) using a Wilcoxon test assuming non-parametric  
30  
31 distribution, we had to recruit at least 499 patients to achieve a power of at least 0.80 with an alpha of  
32  
33 0.05 using a one-tailed test (PASS version 11.0; NCSS, LLC. Kaysville, Utah).  
34  
35  
36

37 The concordance between the 14-day diary and phone interview on the quantity of morphine 5  
38  
39 mg tablets (or equivalent) consumed was assessed with intraclass correlation coefficient. The quantity  
40  
41 of consumed pain medication is presented as a median with inter quartile range (IRQ), since it was not  
42  
43 normally distributed. Mann–Whitney U tests were used to assess the effect of sex and age (<65 vs ≥65)  
44  
45 on the quantity of morphine 5 mg tablets (or equivalent) consumed. Wilcoxon signed rank tests were  
46  
47 performed to compare the quantity of consumed morphine 5 mg tablets (or equivalent) to the null  
48  
49 hypothesis (<10 tablets). The Kruskal–Wallis test was used to compare the quantity of consumed  
50  
51 morphine 5 mg tablets (or equivalent) across pain conditions. Two-by-two comparisons of the quantity  
52  
53 of consumed morphine 5 mg tablets (or equivalent) across pain conditions were made using Mann–  
54  
55  
56  
57  
58  
59  
60

1  
2 Whitney U tests with Bonferroni correction for multiple testing. Finally, one-way anova with Tukey-b  
3  
4 post-hoc comparison tests were used to compare the percentage of unused opioids across pain  
5  
6 conditions. Alpha level was set at 0.05, and all statistics were performed using SPSS version 23 (IBM,  
7  
8 Somers, NY).

## 11 RESULTS

### 14 Description of study cohort

15  
16  
17 During our one-year recruitment period, a total of 1315 patients meeting the inclusion criteria  
18  
19 were initially contacted. Of these, 29% had exclusion criteria (64% for language barrier, 33% for  
20  
21 having chronic pain, and 3% for cancer pain), 13% declined to participate, and 10% could not be  
22  
23 reached for the 14-day follow-up, leaving 627 participants (Figure 1). Non-participating and included  
24  
25 patients were similar on all baseline characteristics (Table 1). Patients' mean age was 51 ( $\pm$ 16) years,  
26  
27 48% were female, and mean pain intensity at triage was 7.8, decreasing to 4.8 at ED discharge. Among  
28  
29 the 627 participants, 385 (61%) of them returned the 14-day diary, 547 (87%) patients responded to the  
30  
31 phone interview, and 310 (49%) had completed both assessments. Intraclass correlation coefficient  
32  
33 performed on opioids consumed was 0.72 (95%CI: 0.66-0.77) between the 14-day diary and phone  
34  
35 interview which is considered good concordance between both measures.<sup>33</sup> Furthermore, the median  
36  
37 number of morphine 5 mg tablets consumed was the same (6.7) for both phone interview and the 14-  
38  
39 day diary. Therefore, data from the phone interview was used for patients with missing the 14-  
40  
41 day diary. Therefore, data from the phone interview was used for patients with missing the 14-  
42  
43 day diary.  
44  
45  
46

### 47 Opioid consumption

48  
49  
50 Almost all patients filled their opioid prescription during the two-week follow-up period (95%).  
51  
52 The median quantity of prescribed morphine 5 mg tablets was 30 (IQR: 28), and similar across all pain  
53  
54 condition categories, varying from 24 to 34 tablets of morphine 5 mg (Table 2). Variability in the  
55  
56  
57

1  
2 consumed pain medication for the “other” pain condition category was similar to that of the four more  
3  
4 common pain condition categories, suggesting that this patient group is comparable. The median  
5  
6 quantity of consumed morphine 5 mg tablets was low (7, IQR: 15) compared to the prescribed quantity,  
7  
8 and differed significantly from the null hypothesis ( $H_0: <10$ ;  $p < 0.001$ ). The consumed quantity varied  
9  
10 significantly across pain condition categories: from 3 tablets of morphine 5 mg for renal colic to 11  
11  
12 tablets morphine 5 mg for fracture ( $p < 0.001$ ). Multiple comparisons showed that patients suffering  
13  
14 from renal colic and abdominal pain consumed fewer opioids than those suffering from  
15  
16 musculoskeletal pain or fracture (all  $p < 0.05$ ). There was no significant effect of age ( $<65$  vs  $\geq 65$ ) or sex  
17  
18 on the quantity of consumed opioids during the two-week follow-up ( $p > 0.40$  for both). Of the whole  
19  
20 sample, 79% consumed opioids, 68% used acetaminophen, and 45% used NSAIDs.  
21  
22  
23  
24

### 25 **Percentage of unused opioids**

26  
27 Over the course of this study, patients discharged from the ED were prescribed 23,402 tablets of  
28  
29 morphine 5 mg, of which 7,353 were consumed during the two-week follow-up period, leaving a total  
30  
31 of 16,049 (68%) unused morphine 5 mg tablets. The percentage of unused opioids showed significant  
32  
33 differences across pain conditions ( $p < 0.01$ ): patients suffering from renal colic and abdominal pain  
34  
35 conditions did not use 81% and 78% of their opioids, respectively, and these were significantly higher  
36  
37 than patients suffering from musculoskeletal, fracture, or “other” pain condition (62% when averaging  
38  
39 3 categories; Figure 2).  
40  
41  
42

### 43 **Quantity of opioids to prescribe**

44  
45 Patients’ pain intensity at two weeks was low (2.0 average) across all pain conditions. Only a  
46  
47 minority of patients ( $<7\%$ ) filled a supplemental opioid prescription, indicating that the initial  
48  
49 prescriptions were sufficient to treat pain for 93% of patients during the two-week period. The quantity  
50  
51 of morphine 5 mg tablets to prescribe in order to adequately supply 80% the patients for two weeks  
52  
53 was 20 for musculoskeletal pain, 30 for fracture, 15 for renal colic or abdominal pain, and 20 for other  
54  
55  
56  
57

1  
2 pain conditions . Patients suffering from renal colic or abdominal pain required only half the quantity  
3  
4 compared to patients suffering from fractures (Figure 3). The quantity of morphine 5 mg tablets to  
5  
6 adequately supply 95% of patients during the first three days after ED discharge was 15.  
7

## 8 9 **DISCUSSION**

10  
11  
12 This prospective study showed that patients discharged from the ED with an acute pain  
13  
14 condition consumed a median of only 7 tablets of morphine 5 mg (or equivalent) but received a median  
15  
16 of 30 tablets of morphine 5 mg (or equivalent) prescription, leaving two thirds of the opioids unused  
17  
18 and available for misuse. Furthermore, patients with renal colic or abdominal pain tended to consume  
19  
20 fewer opioids during the two-week follow-up compared to patients with musculoskeletal pain or  
21  
22 fractures. We also determined that 20 tablets of morphine 5 mg (or equivalent) could adequately supply  
23  
24 80% of patients while limiting the quantity of unused opioids.  
25  
26  
27

28  
29 The number of opioids prescribed to patients discharged from the ED with a pain condition in  
30  
31 this study was similar to that reported for patients who had upper extremity surgery,<sup>22</sup> common general  
32  
33 surgical procedures,<sup>15</sup> and urological surgery.<sup>21</sup> This one-size-fits-all approach, which does not take  
34  
35 into account the patient's individual condition, can probably be attributed to the lack of clinical data on  
36  
37 opioid consumption.<sup>17 18</sup> During the two-week follow-up, our 68% of opioids left unused is also within  
38  
39 the range of percentages observed in surgical studies (58–92%).<sup>15 21-23</sup> . The purpose of this over-  
40  
41 prescribing may be to offset the inconvenience, for both patient and physician, of return visits to the  
42  
43 ED or another medical service to obtain another prescription.<sup>15</sup> However, these large quantities of  
44  
45 unused opioids can be diverted to family and friends, resulting in misuse, dependence, and possibly  
46  
47 death by overdose.<sup>21</sup>  
48  
49  
50  
51

52  
53 Patients suffering from renal colic and abdominal pain needed fewer opioids than those  
54  
55 suffering from a fracture or musculoskeletal pain. Rodgers et al. also reported differences in opioid  
56  
57

1  
2 consumption between different types of surgery, finding that bone surgery required more opioids than  
3  
4 soft tissue procedures.<sup>22</sup> Furthermore, renal colic shows a unique pain resolution pattern: episodic  
5  
6 intense pain until the stone is expelled. These results underscore the need for practitioners to adjust  
7  
8 their opioid prescriptions to the type of pain condition. If patients in our study were prescribed opioids  
9  
10 in order to adequately supply 80% of the patients (20 tablets of morphine 5 mg or equivalent), a total of  
11  
12 10,492 (45%) tablets would not have been available for potential misuse. Since 7 tablets of morphine 5  
13  
14 mg (median consumed) would adequately supply 50% of patients, another way of limiting the quantity  
15  
16 of unused opioids would require the pharmacist to divide the opioid prescription into portions. Even if  
17  
18 repeatable opioid prescriptions are not allowed in most settings, physicians can prescribe a fixed  
19  
20 quantity of opioids while instructing the pharmacist to only supply a fraction at a time. For example, a  
21  
22 physician could prescribe 15 tablets of morphine 5 mg for a renal colic (and be sure to supply  
23  
24 adequately 80% of patients for 2 weeks) and ask the pharmacist to supply only 5 tablets at a time with  
25  
26 an expiration date of the prescription in two weeks. For physicians with an ED opioid prescribing  
27  
28 recommendations to limit the prescription to a three-day supply (30 tablets maximum), 15 tablets of  
29  
30 morphine 5 mg (or equivalent) would adequately supply 95% of patients for that period and limit  
31  
32 unused opioids. Opioids consumption could also be reduced if physicians instructed patients to use  
33  
34 acetaminophen and/or NSAIDs first to reduce their pain before using opioids.  
35  
36  
37  
38  
39  
40  
41

42 This trial has certain limitations. The convenience sample (investigators could not reliably  
43  
44 determine the number of missed patients) from one ED centre and the small sample size for less  
45  
46 frequent pain conditions (especially abdominal pain) limit the generalization of our results. However,  
47  
48 patients were recruited 24/7, and consecutive recruitment was limited only by the fact that the  
49  
50 investigators could not reliably determine the number of patients missed by ED physicians. It is also  
51  
52 possible that other hospitals with different populations or different approach to pain management (ex:  
53  
54 adequate dose of non-opioid analgesic first) could change opioid consumption.. Moreover, the reasons  
55  
56  
57  
58  
59  
60



1  
2 for the participants to stop consuming opioids were not recorded. Some patients may have restricted  
3  
4 their opioid use due to adverse effects, fear of addiction, or fear of running out of tablets, among others.  
5  
6 There is a need for a multi-centre prospective study with larger sample sizes for each pain condition, to  
7  
8 determine the impacts on the quantity of unused opioids and incidences of misuse, dependence, and  
9  
10 opioid overdose.  
11  
12  
13

14 In summary, patients who are discharged from the ED with an acute pain condition consumed a  
15  
16 median of fewer than 10 tablets of morphine 5 mg (or equivalent) during the following two weeks,  
17  
18 accounting for only one third of the prescribed opioids, leaving two thirds of the opioids unused and  
19  
20 available for potential misuse. The quantity of opioids to adequately supply 80% of patients for two  
21  
22 weeks was 20 tablets of morphine 5 mg (or equivalent) for musculoskeletal pain, 30 for fracture, 15 for  
23  
24 renal colic or abdominal pain, and 20 for other pain conditions. Also, 15 tablets of morphine 5 mg (or  
25  
26 equivalent) would adequately supply 95% of patients for the first three days. ED physicians should  
27  
28 consider prescribing a smaller quantity of opioids and asking the pharmacist to dispense them in  
29  
30 portions to minimize unused opioids. These results should be confirmed in a multi-centre prospective  
31  
32 study  
33  
34  
35  
36  
37

### 38 **Acknowledgments**

39  
40 The authors would like to thank Martin Marquis and Margaret McKyes for their contributions  
41  
42 to manuscript revision.  
43  
44  
45  
46  
47  
48  
49  
50  
51  
52  
53  
54  
55  
56  
57

1  
2  
3  
4  
5  
6  
7  
8  
9  
10  
11  
12  
13  
14  
15  
16  
17  
18  
19  
20  
21  
22  
23  
24  
25  
26  
27  
28  
29  
30  
31  
32  
33  
34  
35  
36  
37  
38  
39  
40  
41  
42  
43  
44  
45  
46  
47  
48  
49  
50  
51  
52  
53  
54  
55  
56  
57  
58  
59  
60  
**REFERENCES**

1. Perrone J, Nelson LS, Yealy DM. Choosing Analgesics Wisely: What We Know (and Still Need to Know) About Long-Term Consequences of Opioids. *Ann Emerg Med* 2015;65(5):500-2. doi: 10.1016/j.annemergmed.2015.01.021
2. Gomes T, Mamdani MM, Paterson JM, et al. Trends in high-dose opioid prescribing in Canada. *Canadian family physician Medecin de famille canadien* 2014;60(9):826-32. [published Online First: 2014/09/14]
3. Mazer-Amirshahi M, Mullins PM, Rasooly I, et al. Rising opioid prescribing in adult U.S. emergency department visits: 2001-2010. *Academic emergency medicine : official journal of the Society for Academic Emergency Medicine* 2014;21(3):236-43. doi: 10.1111/acem.12328 [published Online First: 2014/03/19]
4. Cantrill SV, Brown MD, Carlisle RJ, et al. Clinical policy: critical issues in the prescribing of opioids for adult patients in the emergency department. *Annals of emergency medicine* 2012;60(4):499-525. doi: 10.1016/j.annemergmed.2012.06.013 [published Online First: 2012/09/27]
5. Hasegawa K, Espinola JA, Brown DF, et al. Trends in U.S. emergency department visits for opioid overdose, 1993-2010. *Pain medicine* 2014;15(10):1765-70. doi: 10.1111/pme.12461 [published Online First: 2014/08/21]
6. CDC. Opioid overdoses in the United States. *Journal of pain & palliative care pharmacotherapy* 2012;26(1):44-7. doi: 10.3109/15360288.2011.653875 [published Online First: 2012/03/28]
7. Bijur PE, Esses D, Chang AK, et al. Dosing and titration of intravenous opioid analgesics administered to ED patients in acute severe pain. *Am J Emerg Med* 2011 doi: 10.1016/j.ajem.2011.06.015 [published Online First: 2011/09/13]
8. Dhalla IA, Mamdani MM, Sivilotti ML, et al. Prescribing of opioid analgesics and related mortality before and after the introduction of long-acting oxycodone. *CMAJ : Canadian Medical Association journal = journal de l'Association medicale canadienne* 2009;181(12):891-6. doi: 10.1503/cmaj.090784 [published Online First: 2009/12/09]
9. Beaudoin FL, Straube S, Lopez J, et al. Prescription opioid misuse among ED patients discharged with opioids. *The American journal of emergency medicine* 2014;32(6):580-5. doi: 10.1016/j.ajem.2014.02.030 [published Online First: 2014/04/15]
10. Wilsey BL, Fishman SM, Ogden C. Prescription opioid abuse in the emergency department. *The Journal of law, medicine & ethics : a journal of the American Society of Law, Medicine & Ethics* 2005;33(4):770-82. [published Online First: 2006/05/12]
11. Fischer B, Argento E. Prescription opioid related misuse, harms, diversion and interventions in Canada: a review. *Pain physician* 2012;15(3 Suppl):Es191-203. [published Online First: 2012/07/20]
12. Jones CM, Mack KA, Paulozzi LJ. Pharmaceutical overdose deaths, United States, 2010. *JAMA : the journal of the American Medical Association* 2013;309(7):657-9. doi: 10.1001/jama.2013.272 [published Online First: 2013/02/21]
13. Manchikanti L, Helm S, 2nd, Fellows B, et al. Opioid epidemic in the United States. *Pain physician* 2012;15(3 Suppl):Es9-38. [published Online First: 2012/07/20]
14. CCSA. Prescription opioids Ottawa, Canada2017 [Canadian Centre on Substance Use and Addiction]. Available from: <http://www.ccsa.ca/Resource%20Library/CCSA-Canadian-Drug-Summary-Prescription-Opioids-2017-en.pdf2018>.

15. Hill MV, McMahon ML, Stucke RS, et al. Wide Variation and Excessive Dosage of Opioid Prescriptions for Common General Surgical Procedures. *Ann Surg* 2017;265(4):709-14. doi: 10.1097/SLA.0000000000001993
16. Maxwell JC. The prescription drug epidemic in the United States: a perfect storm. *Drug and alcohol review* 2011;30(3):264-70. doi: 10.1111/j.1465-3362.2011.00291.x [published Online First: 2011/05/07]
17. Neven DE, Sabel JC, Howell DN, et al. The development of the Washington State emergency department opioid prescribing guidelines. *Journal of medical toxicology : official journal of the American College of Medical Toxicology* 2012;8(4):353-9. doi: 10.1007/s13181-012-0267-6 [published Online First: 2012/10/12]
18. Juurlink DN, Dhalla IA, Nelson LS. Improving opioid prescribing: the New York City recommendations. *JAMA : the journal of the American Medical Association* 2013;309(9):879-80. doi: 10.1001/jama.2013.1139 [published Online First: 2013/03/07]
19. Poon SJ, Greenwood-Ericksen MB. The opioid prescription epidemic and the role of emergency medicine. *Annals of emergency medicine* 2014;64(5):490-5. doi: 10.1016/j.annemergmed.2014.06.016 [published Online First: 2014/07/16]
20. Weiner SG, Perrone J, Nelson LS. Centering the pendulum: the evolution of emergency medicine opioid prescribing guidelines. *Annals of emergency medicine* 2013;62(3):241-3. doi: 10.1016/j.annemergmed.2013.02.028 [published Online First: 2013/04/02]
21. Bates C, Laciak R, Southwick A, et al. Overprescription of postoperative narcotics: a look at postoperative pain medication delivery, consumption and disposal in urological practice. *J Urol* 2011;185(2):551-5. doi: 10.1016/j.juro.2010.09.088
22. Rodgers J, Cunningham K, Fitzgerald K, et al. Opioid consumption following outpatient upper extremity surgery. *J Hand Surg Am* 2012;37(4):645-50. doi: 10.1016/j.jhsa.2012.01.035
23. Bicket MC, Long JJ, Pronovost PJ, et al. Prescription Opioid Analgesics Commonly Unused After Surgery: A Systematic Review. *JAMA surgery* 2017;152(11):1066-71. doi: 10.1001/jamasurg.2017.0831 [published Online First: 2017/08/03]
24. Bartels K, Mayes LM, Dingmann C, et al. Opioid Use and Storage Patterns by Patients after Hospital Discharge following Surgery. *PLoS one* 2016;11(1):e0147972. doi: 10.1371/journal.pone.0147972 [published Online First: 2016/01/30]
25. Alam A, Gomes T, Zheng H, et al. Long-term analgesic use after low-risk surgery: a retrospective cohort study. *Archives of internal medicine* 2012;172(5):425-30. doi: 10.1001/archinternmed.2011.1827 [published Online First: 2012/03/14]
26. Hoppe JA, Nelson LS, Perrone J, et al. Opioid Prescribing in a Cross Section of US Emergency Departments. *Annals of emergency medicine* 2015;66(3):253-59.e1. doi: 10.1016/j.annemergmed.2015.03.026 [published Online First: 2015/05/09]
27. Daoust R, Paquet J, Morris J, et al. Quantity of opioid to prescribe for acute pain to limit misuse after emergency department discharge. *SAEM: Society for Academic Emergency Medicine*; 2017; Orlando; US.
28. Harris PA, Taylor R, Thielke R, et al. Research electronic data capture (REDCap) – A metadata-driven methodology and workflow process for providing translational research informatics support. *J Biomed Inform* 2009;42(2):377-81.
29. Daoust R, Paquet J, Lavigne G, et al. Impact of age, sex and route of administration on adverse events after opioid treatment in the emergency department: a retrospective study. *Pain research & management : the journal of the Canadian Pain Society = journal de la société canadienne pour le traitement de la douleur* 2015;20(1):23-8. [published Online First: 2015/02/11]

- 1  
2 30. O'Neil JT, Wang ML, Kim N, et al. Prospective Evaluation of Opioid Consumption After  
3 Distal Radius Fracture Repair Surgery. *American journal of orthopedics (Belle Mead,  
4 NJ)* 2017;46(1):E35-e40. [published Online First: 2017/02/25]  
5  
6 31. Berdine HJ, Nesbit SA. Equianalgesic dosing of opioids. *Journal of pain & palliative care  
7 pharmacotherapy* 2006;20(4):79-84. [published Online First: 2006/12/22]  
8  
9 32. Chapman CR, Fosnocht D, Donaldson GW. Resolution of acute pain following discharge  
10 from the emergency department: the acute pain trajectory. *J Pain* 2012;13(3):235-41.  
11 doi: 10.1016/j.jpain.2011.11.007 [published Online First: 2012/01/31]  
12  
13 33. Cicchetti DV. Guidelines, criteria, and rules of thumb for evaluating normed and  
14 standardized assessment instruments in psychology. *Psychological Assessment*  
15 1994;6(4):284-90. doi: 10.1037/1040-3590.6.4.284  
16  
17  
18  
19  
20  
21  
22  
23  
24  
25  
26  
27  
28  
29  
30  
31  
32  
33  
34  
35  
36  
37  
38  
39  
40  
41  
42  
43  
44  
45  
46  
47  
48  
49  
50  
51  
52  
53  
54  
55  
56  
57  
58  
59  
60

For peer review only

1  
2 Figure legends  
3

4  
5 Figure 1. Flow chart of patients' enrollment in the study.  
6

7  
8 Figure 2. Percentage of morphine 5 mg equivalent tablets that remained unused after the two-week  
9  
10 follow-up for each pain condition category. Mean  $\pm$  sem are reported. Brackets indicate the results of  
11  
12 the Tukey-b multiple comparisons tests. Renal colic and abdominal pain have higher percentage of  
13  
14 unused opioids than each of the three other pain conditions.  
15

16  
17  
18 Figure 3. Number of morphine 5 mg tablets (or equivalent) to prescribe to supply 80% of patients for  
19  
20 each pain condition category.  
21  
22  
23  
24  
25  
26  
27  
28  
29  
30  
31  
32  
33  
34  
35  
36  
37  
38  
39  
40  
41  
42  
43  
44  
45  
46  
47  
48  
49  
50  
51  
52  
53  
54  
55  
56  
57  
58  
59  
60

Table 1. Comparison of baseline characteristics between included and excluded (refused to participate or were lost to the 14-day follow-up) patients.

| Baseline characteristics                                     | Included<br>(N=627) | Excluded<br>(N=310) |
|--------------------------------------------------------------|---------------------|---------------------|
| Mean age ( $\pm$ SD)                                         | 51.0 (15.9)         | 50.0 (17.8)         |
| Female (%)                                                   | 47.8                | 49.0                |
| ED arrival mode (%)                                          |                     |                     |
| -By himself                                                  | 78.6                | 79.9                |
| -By ambulance                                                | 21.3                | 20.1                |
| High (level 1 or 2) triage priority (%)                      | 42.6                | 45.3                |
| Mean pain intensity (0-10 scale) at triage ( $\pm$ SD)       | 7.8 (2.0)           | 8.0 (1.7)           |
| ED treatment section (%)                                     |                     |                     |
| -Ambulatory                                                  | 64.6                | 64.1                |
| -On stretcher                                                | 35.4                | 35.9                |
| Type of pain conditions (%)                                  |                     |                     |
| -Musculoskeletal pain                                        | 44.0                | 40.3                |
| -Fracture                                                    | 19.1                | 19.7                |
| -Renal colic                                                 | 17.0                | 17.7                |
| -Abdominal pain                                              | 6.0                 | 5.2                 |
| -Other                                                       | 13.9                | 17.1                |
| Received a Tylenol prescription at ED discharged (%)         | 71.6                | 70.3                |
| Received a NSAIDs prescription at ED discharged (%)          | 45.8                | 47.4                |
| Opioid prescription type (%)                                 |                     |                     |
| -Morphine                                                    | 43.6                | 42.7                |
| -Oxycodone                                                   | 40.5                | 36.9                |
| -Hydromorphone                                               | 15.9                | 20.4                |
| Median (IQR) morphine 5 mg equivalent tablets prescription   | 30 (28)             | 30 (25)             |
| Median (IQR) ED stay (hours)                                 | 5.3 (3.6-7.7)       | 5.2 (3.7-7.9)       |
| Mean ( $\pm$ SD) pain intensity (0-10 scale) at ED discharge | 4.8 (2.9)           | 4.7 (2.9)           |

IQR: inter-quartile range; NSAIDs: nonsteroidal anti-inflammatory drug

Table 2. Pain intensity and pain medication for each pain condition during the two-week follow-up.

| Variables                                              | Musculo-skeletal | Fracture  | Renal colic | Abdominal | Other     | Total     |
|--------------------------------------------------------|------------------|-----------|-------------|-----------|-----------|-----------|
| Number of patients                                     | 280              | 119       | 106         | 37        | 85        | 627       |
| Mean ( $\pm$ SD) pain intensity at ED discharged       | 5.6 (2.4)        | 5.2 (2.6) | 1.9 (2.7)   | 3.7 (3.2) | 5.5 (3.0) | 4.8 (2.9) |
| Mean ( $\pm$ SD) pain intensity at two-week            | 2.6 (2.7)        | 2.6 (2.9) | 0.5 (1.2)   | 1.6 (2.8) | 1.8 (2.6) | 2.0 (2.6) |
| Filled opioid prescription (%)                         | 95.1             | 90.4      | 99.0        | 97.1      | 91.4      | 94.5      |
| Patients who filled another opioid prescription (n, %) | 22 (7.9)         | 10 (8.4)  | 3 (2.8)     | 2 (5.4)   | 5 (5.9)   | 42 (6.7)  |
| Median (IQR) number of morphine 5 mg prescribed        | 30 (28)          | 34 (30)   | 31 (25)     | 30 (19)   | 24 (26)   | 30 (28)   |
| Median (IQR) number of morphine 5 mg consumed          | 8 (17)           | 11 (20)   | 3 (10)      | 3 (8)     | 6 (14)    | 7 (15)    |
| Received acetaminophen prescription at discharged (%)  | 78.2             | 79.0      | 57.5        | 56.8      | 63.5      | 71.6      |
| Consumed acetaminophen (%)                             | 73.9             | 87.4      | 49.1        | 48.6      | 52.9      | 67.9      |
| Received NSAIDs prescription at discharged (%)         | 49.3             | 28.6      | 64.2        | 40.5      | 37.6      | 45.8      |
| Consumed NSAIDs (%)                                    | 51.8             | 35.3      | 50.9        | 35.1      | 34.1      | 45.1      |

IQR: inter-quartile range; tablet; NSAIDs: nonsteroidal anti-inflammatory drugs

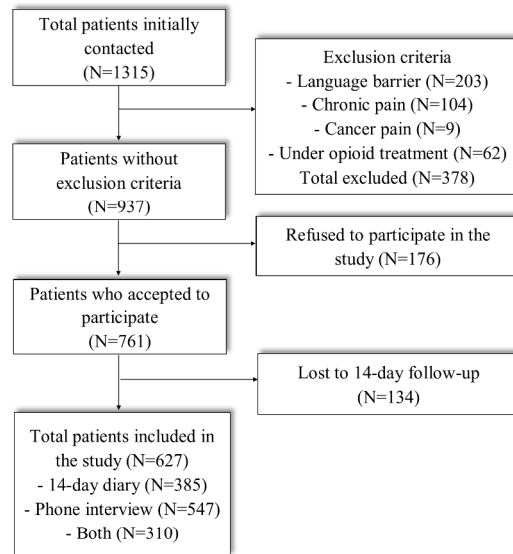

Figure 1. Flow chart of patients' enrollment in the study.

215x279mm (300 x 300 DPI)



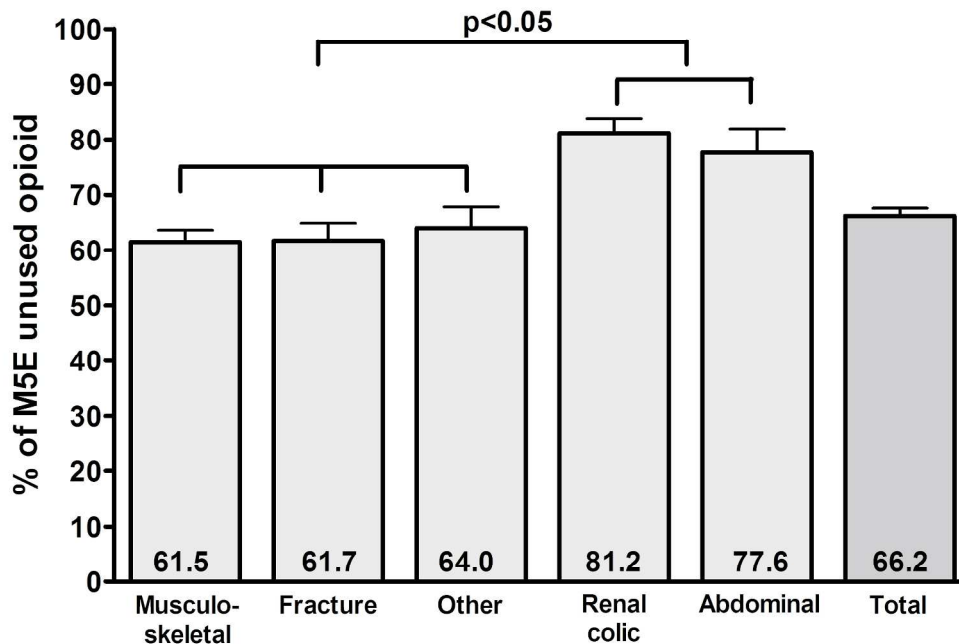

Figure 2. Percentage of morphine 5 mg equivalent pills that remained unused after the two-week follow-up for each pain condition category. Mean  $\pm$  sem are reported. Brackets indicate the results of the Tukey-b multiple comparisons tests. Renal colic and abdominal pain have higher percentage of unused opioids than each of the three other pain conditions.

230x169mm (300 x 300 DPI)

1  
2  
3  
4  
5  
6  
7  
8  
9  
10  
11  
12  
13  
14  
15  
16  
17  
18  
19  
20  
21  
22  
23  
24  
25  
26  
27  
28  
29  
30  
31  
32  
33  
34  
35  
36  
37  
38  
39  
40  
41  
42  
43  
44  
45  
46  
47  
48  
49  
50  
51  
52  
53  
54  
55  
56  
57  
58  
59  
60

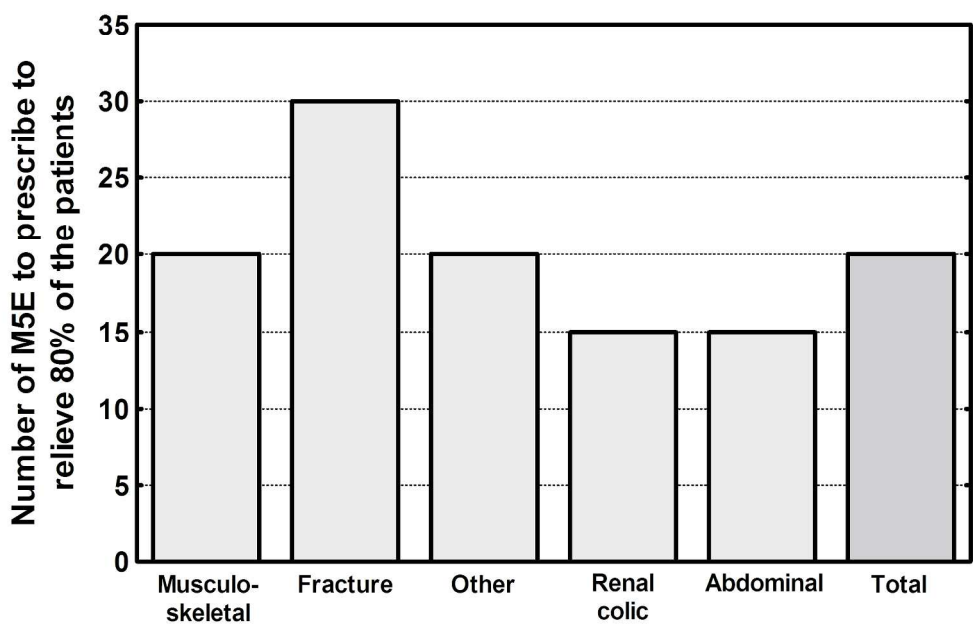

Figure 3. Number of morphine 5 mg equivalent pills to prescribe to supply 80% of patients for each pain condition category.

237x169mm (300 x 300 DPI)

## STROBE Statement—checklist of items that should be included in reports of observational studies

|                              | Item No | Recommendation                                                                                                                                                                                                                                                                                                                                                                                                                                                                                                                                                                                                                                                                                             |
|------------------------------|---------|------------------------------------------------------------------------------------------------------------------------------------------------------------------------------------------------------------------------------------------------------------------------------------------------------------------------------------------------------------------------------------------------------------------------------------------------------------------------------------------------------------------------------------------------------------------------------------------------------------------------------------------------------------------------------------------------------------|
| <b>Title and abstract</b>    | 1       | (a) Indicate the study's design with a commonly used term in the title or the abstract<br>Page 1<br>(b) Provide in the abstract an informative and balanced summary of what was done and what was found<br>Page 3                                                                                                                                                                                                                                                                                                                                                                                                                                                                                          |
| <b>Introduction</b>          |         |                                                                                                                                                                                                                                                                                                                                                                                                                                                                                                                                                                                                                                                                                                            |
| Background/rationale         | 2       | Explain the scientific background and rationale for the investigation being reported<br>Page 5                                                                                                                                                                                                                                                                                                                                                                                                                                                                                                                                                                                                             |
| Objectives                   | 3       | State specific objectives, including any prespecified hypotheses<br>Page 6                                                                                                                                                                                                                                                                                                                                                                                                                                                                                                                                                                                                                                 |
| <b>Methods</b>               |         |                                                                                                                                                                                                                                                                                                                                                                                                                                                                                                                                                                                                                                                                                                            |
| Study design                 | 4       | Present key elements of study design early in the paper<br>Page 6                                                                                                                                                                                                                                                                                                                                                                                                                                                                                                                                                                                                                                          |
| Setting                      | 5       | Describe the setting, locations, and relevant dates, including periods of recruitment, exposure, follow-up, and data collection<br>Page 6                                                                                                                                                                                                                                                                                                                                                                                                                                                                                                                                                                  |
| Participants                 | 6       | (a) <i>Cohort study</i> —Give the eligibility criteria, and the sources and methods of selection of participants. Describe methods of follow-up<br>Page 6<br><i>Case-control study</i> —Give the eligibility criteria, and the sources and methods of case ascertainment and control selection. Give the rationale for the choice of cases and controls<br><i>Cross-sectional study</i> —Give the eligibility criteria, and the sources and methods of selection of participants<br>(b) <i>Cohort study</i> —For matched studies, give matching criteria and number of exposed and unexposed<br><i>Case-control study</i> —For matched studies, give matching criteria and the number of controls per case |
| Variables                    | 7       | Clearly define all outcomes, exposures, predictors, potential confounders, and effect modifiers. Give diagnostic criteria, if applicable<br>Page 7                                                                                                                                                                                                                                                                                                                                                                                                                                                                                                                                                         |
| Data sources/<br>measurement | 8*      | For each variable of interest, give sources of data and details of methods of assessment (measurement). Describe comparability of assessment methods if there is more than one group<br>Page 6                                                                                                                                                                                                                                                                                                                                                                                                                                                                                                             |
| Bias                         | 9       | Describe any efforts to address potential sources of bias<br>Page 8                                                                                                                                                                                                                                                                                                                                                                                                                                                                                                                                                                                                                                        |
| Study size                   | 10      | Explain how the study size was arrived at<br>Page 8                                                                                                                                                                                                                                                                                                                                                                                                                                                                                                                                                                                                                                                        |
| Quantitative variables       | 11      | Explain how quantitative variables were handled in the analyses. If applicable, describe which groupings were chosen and why<br>Page 8                                                                                                                                                                                                                                                                                                                                                                                                                                                                                                                                                                     |
| Statistical methods          | 12      | (a) Describe all statistical methods, including those used to control for confounding                                                                                                                                                                                                                                                                                                                                                                                                                                                                                                                                                                                                                      |

1  
2  
3  
4  
5  
6  
7  
8  
9  
10  
11  
12  
13  
14  
15  
16  
17  
18  
19  
20  
21  
22  
23  
24  
25  
26  
27  
28  
29  
30  
31  
32  
33  
34  
35  
36  
37  
38  
39  
40  
41  
42  
43  
44  
45  
46  
47  
48  
49  
50  
51  
52  
53  
54  
55  
56  
57  
58  
59  
60

Page 8

---

(b) Describe any methods used to examine subgroups and interactions

Page 8

---

(c) Explain how missing data were addressed

Page 9

---

(d) *Cohort study*—If applicable, explain how loss to follow-up was addressed

Page 9

*Case-control study*—If applicable, explain how matching of cases and controls was addressed

*Cross-sectional study*—If applicable, describe analytical methods taking account of sampling strategy

---

(e) Describe any sensitivity analyses

No sensitivity analysis

Continued on next page

For peer review only

**Results**

|                  |     |                                                                                                                                                                                                                         |
|------------------|-----|-------------------------------------------------------------------------------------------------------------------------------------------------------------------------------------------------------------------------|
| Participants     | 13* | (a) Report numbers of individuals at each stage of study—eg numbers potentially eligible, examined for eligibility, confirmed eligible, included in the study, completing follow-up, and analysed<br>Page 9             |
|                  |     | (b) Give reasons for non-participation at each stage<br>Page 9                                                                                                                                                          |
|                  |     | (c) Consider use of a flow diagram<br>Page 9                                                                                                                                                                            |
| Descriptive data | 14* | (a) Give characteristics of study participants (eg demographic, clinical, social) and information on exposures and potential confounders<br>Page 9                                                                      |
|                  |     | (b) Indicate number of participants with missing data for each variable of interest                                                                                                                                     |
|                  |     | (c) <i>Cohort study</i> —Summarise follow-up time (eg, average and total amount)<br>Page 9                                                                                                                              |
| Outcome data     | 15* | <i>Cohort study</i> —Report numbers of outcome events or summary measures over time<br>Page 10                                                                                                                          |
|                  |     | <i>Case-control study</i> —Report numbers in each exposure category, or summary measures of exposure                                                                                                                    |
|                  |     | <i>Cross-sectional study</i> —Report numbers of outcome events or summary measures                                                                                                                                      |
| Main results     | 16  | (a) Give unadjusted estimates and, if applicable, confounder-adjusted estimates and their precision (eg, 95% confidence interval). Make clear which confounders were adjusted for and why they were included<br>Page 10 |
|                  |     | (b) Report category boundaries when continuous variables were categorized                                                                                                                                               |
|                  |     | (c) If relevant, consider translating estimates of relative risk into absolute risk for a meaningful time period                                                                                                        |
| Other analyses   | 17  | Report other analyses done—eg analyses of subgroups and interactions, and sensitivity analyses                                                                                                                          |

**Discussion**

|                  |    |                                                                                                                                                                                       |
|------------------|----|---------------------------------------------------------------------------------------------------------------------------------------------------------------------------------------|
| Key results      | 18 | Summarise key results with reference to study objectives<br>Page 10                                                                                                                   |
| Limitations      | 19 | Discuss limitations of the study, taking into account sources of potential bias or imprecision.<br>Page 12<br>Discuss both direction and magnitude of any potential bias<br>Page 12   |
| Interpretation   | 20 | Give a cautious overall interpretation of results considering objectives, limitations, multiplicity of analyses, results from similar studies, and other relevant evidence<br>Page 11 |
| Generalisability | 21 | Discuss the generalisability (external validity) of the study results<br>Page 12                                                                                                      |

**Other information**

|         |    |                                                                                                                                                                         |
|---------|----|-------------------------------------------------------------------------------------------------------------------------------------------------------------------------|
| Funding | 22 | Give the source of funding and the role of the funders for the present study and, if applicable, for the original study on which the present article is based<br>Page 1 |
|---------|----|-------------------------------------------------------------------------------------------------------------------------------------------------------------------------|

1  
2 \*Give information separately for cases and controls in case-control studies and, if applicable, for exposed and  
3 unexposed groups in cohort and cross-sectional studies.  
4

5 **Note:** An Explanation and Elaboration article discusses each checklist item and gives methodological background and  
6 published examples of transparent reporting. The STROBE checklist is best used in conjunction with this article (freely  
7 available on the Web sites of PLoS Medicine at <http://www.plosmedicine.org/>, Annals of Internal Medicine at  
8 <http://www.annals.org/>, and Epidemiology at <http://www.epidem.com/>). Information on the STROBE Initiative is  
9 available at [www.strobe-statement.org](http://www.strobe-statement.org).  
10  
11  
12  
13  
14  
15  
16  
17  
18  
19  
20  
21  
22  
23  
24  
25  
26  
27  
28  
29  
30  
31  
32  
33  
34  
35  
36  
37  
38  
39  
40  
41  
42  
43  
44  
45  
46  
47  
48  
49  
50  
51  
52  
53  
54  
55  
56  
57  
58  
59  
60

# BMJ Open

## Quantity of opioids consumed following an emergency department visit for acute pain: a Canadian prospective cohort study.

|                                    |                                                                                                                                                                                                                                                                                                                                                                                                                                                                                                                                                                                                                                                                                                                                                                                                |
|------------------------------------|------------------------------------------------------------------------------------------------------------------------------------------------------------------------------------------------------------------------------------------------------------------------------------------------------------------------------------------------------------------------------------------------------------------------------------------------------------------------------------------------------------------------------------------------------------------------------------------------------------------------------------------------------------------------------------------------------------------------------------------------------------------------------------------------|
| Journal:                           | <i>BMJ Open</i>                                                                                                                                                                                                                                                                                                                                                                                                                                                                                                                                                                                                                                                                                                                                                                                |
| Manuscript ID                      | bmjopen-2018-022649.R2                                                                                                                                                                                                                                                                                                                                                                                                                                                                                                                                                                                                                                                                                                                                                                         |
| Article Type:                      | Research                                                                                                                                                                                                                                                                                                                                                                                                                                                                                                                                                                                                                                                                                                                                                                                       |
| Date Submitted by the Author:      | 03-Aug-2018                                                                                                                                                                                                                                                                                                                                                                                                                                                                                                                                                                                                                                                                                                                                                                                    |
| Complete List of Authors:          | Daoust, Raoul; Hôpital Sacré-Coeur de Montréal, Emergency<br>Paquet, Jean; Hôpital Sacré-Coeur de Montréal, Emergency<br>Cournoyer, Alexis; Université de Montréal Faculté de médecine, ; Hôpital<br>du Sacre-Coeur de Montreal, Department of Emergency Medicine<br>Piette, Éric; Hôpital Sacré-Coeur de Montréal, Emergency<br>Morris, Judy; HSCM, Emergency Medicine<br>Gosselin, Sophie; McGill University Health Centre, Department of Medicine<br>and Emergency Medicine<br>Émond, Marcel; Université Laval Faculté de médecine, Département de<br>médecine d'urgence et famille<br>Lavigne, Gilles; Université de Montréal, Médecine dentaire<br>Lee, Jacques; University of Toronto, Clinical Epidemiology Unit<br>Chauny, Jean-Marc; Centre de recherche de l'Hôpital du Sacré-Coeur, |
| <b>Primary Subject<br>Heading</b>: | Emergency medicine                                                                                                                                                                                                                                                                                                                                                                                                                                                                                                                                                                                                                                                                                                                                                                             |
| Secondary Subject Heading:         | Pharmacology and therapeutics, Addiction                                                                                                                                                                                                                                                                                                                                                                                                                                                                                                                                                                                                                                                                                                                                                       |
| Keywords:                          | ACCIDENT & EMERGENCY MEDICINE, PAIN MANAGEMENT, Substance<br>misuse < PSYCHIATRY, Opioids, Acute pain, Emergency department                                                                                                                                                                                                                                                                                                                                                                                                                                                                                                                                                                                                                                                                    |
|                                    |                                                                                                                                                                                                                                                                                                                                                                                                                                                                                                                                                                                                                                                                                                                                                                                                |

SCHOLARONE™  
Manuscripts

1  
2 **Quantity of opioids consumed following an emergency department visit for acute pain: a**  
3 **Canadian prospective cohort study.**  
4

5 Raoul Daoust,<sup>a,b</sup> MD, MSc, Jean Paquet,<sup>a</sup> PhD, Alexis Cournoyer,<sup>a,b</sup> MD, Éric Piette,<sup>a,b</sup> MD, MSc,  
6 Judy Morris,<sup>a,b</sup> MD, MSc, Sophie Gosselin,<sup>e</sup> MD, Marcel Émond,<sup>c,d</sup> MD, MSc, Gilles Lavigne,<sup>g,h</sup>  
7 DMD, PhD, Jacques Lee,<sup>i</sup> MD, Jean-Marc Chauny,<sup>a,b</sup> MD, MSc  
8  
9

10  
11 <sup>a</sup>Department of Emergency Medicine, Research Centre, CIUSSS-Nord-de-l'Île de-Montréal, Sacré-  
12 Coeur Hospital, Montréal, Québec, Canada  
13

14 <sup>b</sup>Département Médecine Familiale et Médecine d'Urgence, Faculté de Médecine, Université de  
15 Montréal, Montréal, Québec, Canada  
16

17 <sup>c</sup>Département de médecine d'urgence et famille, Faculté de médecine, Université Laval, Québec,  
18 Canada  
19

20 <sup>d</sup>Département d'urgence du CHU-Québec, Québec, Canada  
21

22 <sup>e</sup>Department of Emergency Medicine, McGill University Health Centre, McGill University, Montreal,  
23 Québec, Canada  
24

25 <sup>f</sup>Trauma, Research Centre, CIUSSS-Nord-de-l'Île de-Montréal, Sacré-Coeur Hospital, Montréal,  
26 Québec, Canada  
27

28 <sup>g</sup>Faculties of Dental Medicine and Medicine, Université de Montréal, Montréal, Québec, Canada  
29

30 <sup>h</sup>Centre for Advanced Research in Sleep Medicine, Hôpital du Sacré-Coeur de Montréal (CIUSSS du  
31 Nord de-l'Île-de-Montréal), Montréal, Québec, Canada  
32

33 <sup>i</sup>Department of Emergency Services and scientist, Clinical Epidemiology Unit, Sunnybrook Health  
34 Sciences, Ottawa Hospital Research Institute  
35  
36  
37

38  
39  
40 **Meeting:** Part of this study results have been presented at SAEM annual meeting, Orlando, Florida  
41 2017  
42

43 **Financial support:** This study was supported by the Sacré-Coeur Hospital's emergency medicine  
44 research fund.  
45

46 **Conflicts of interest:** There is no financial benefit or conflict of interest to report from all co-authors.  
47

48 **Author contributions:**

49 R.D. and J.M.C conceived the study and obtained research funding. All authors contributed to the final  
50 protocol and data interpretation. J.P. was responsible for data management and statistical analysis. R.D.  
51 drafted the manuscript, and A. C., E.P., J.M., S.G., M.E., G.L., J.L. contributed substantially to its  
52 revision. All authors approved the final manuscript as submitted and have agreed to be accountable for  
53 all aspects of the work.  
54  
55  
56  
57



1  
2 **Data sharing statement:** Original data set found in the manuscript is available upon request to the  
3 corresponding author.  
4

5  
6 **Word count:** 2498.  
7

8 **Keywords:** Opioids, Acute pain, Emergency department.  
9

10  
11  
12 **Corresponding author and request for reprints:**

13 Raoul Daoust, MD, MSc  
14 Corresponding Author  
15 Emergency Department  
16 Sacré-Coeur Hospital  
17 Phone: 514 338-2222 (7584)  
18 5400 Gouin Blvd. West  
19 Montreal (QC) Canada H4J 1C5  
20 Email: [raoul.daoust@videotron.ca](mailto:raoul.daoust@videotron.ca)  
21  
22  
23

24  
25 **Running head:** Opioid use after an ED visit for acute pain  
26  
27  
28  
29  
30  
31  
32  
33  
34  
35  
36  
37  
38  
39  
40  
41  
42  
43  
44  
45  
46  
47  
48  
49  
50  
51  
52  
53  
54  
55  
56  
57  
58  
59  
60

## ABSTRACT

**Objectives:** Prescription opioid diversion is a significant contributor to the opioid misuse epidemic.

We examined the quantity of opioids consumed by emergency department (ED) discharged patients after treatment for an acute pain condition (musculoskeletal, fracture, renal colic, abdominal pain, and other), and the percentage of unused opioids available for potential misuse.

**Design:** Prospective cohort study.

**Setting:** Tertiary care trauma centre academic hospital.

**Participants:** A convenience sample of patients  $\geq 18$  years who visited the ED for an acute pain condition ( $\leq 2$  weeks) and were discharged with an opioid prescription. Patients completed a 14-day paper diary of daily pain medication use. To reduce lost to follow-up, participants also responded to standardized phone interview questions about their previous 14-day pain medication use.

**Outcomes:** Quantity of morphine 5 mg tablets (or equivalent) prescribed, consumed, and unused during a 14-day follow-up. Quantity of opioids to adequately supply 80% of patients for 2 weeks and 95% of patients for the first 3 days was also calculated.

**Results:** Results for 627 patients were analyzed (mean age  $\pm$ SD: 51 $\pm$ 16 years, 48% women). Patients consumed a median of 7 tablets of morphine 5 mg (32% of the total prescribed opioids). The quantity of opioids to adequately supply 80% of patients for 2 weeks was 20 tablets of morphine 5 mg for musculoskeletal pain, 30 for fracture, 15 for renal colic or abdominal pain, and 20 for other pain conditions. The quantity to adequately supply 95% of patients for the first three days was 15 tablets of morphine 5 mg.

**Conclusions:** Patients discharged from the ED with an acute pain condition consumed a median of fewer than 10 tablets of morphine 5 mg (or equivalent). ED physicians should consider prescribing a smaller quantity of opioids and asking the pharmacist to dispense them in portions to minimize unused opioids.

## STRENGTHS AND LIMITATIONS OF THIS STUDY

-First large study to prospectively document opioids consumption after an acute pain emergency department visit.

-Use of a 14-day daily diary to document opioid consumption.

- Opioid consumption data from a diary or phone interview could be biased by self-report

-The convenience sample from one ED centre and the small sample size for less frequent pain conditions limit the generalization of our results.

## INTRODUCTION

In the 1990s, physicians, who were perceived as undertreating pain, changed their practice in order to identify and treat pain more effectively.<sup>1</sup> Consequently, emergency department (ED) opioid prescriptions increased significantly in the last two decades.<sup>2,3</sup> Meanwhile, opioid misuse (i.e., intentional use for nonmedical purposes), dependence, overdoses, and deaths have increased to epidemic proportions in both the US and Canada.<sup>4-12</sup>

Over 10 million US citizens have misused opioids at some point in their life<sup>13</sup> and 82,000 Canadians (0.3% of the total population) a non-medical use of prescription opioids in 2015.<sup>14</sup> It is becoming increasingly clear that the availability of unused prescription opioids contributes to misuse.<sup>15</sup> For example, 71% of opioid abusers received them through the diversion of prescription opioids (i.e., transfer of opioids to someone other than the initial prescription holder), and in 55% of cases, these tablets were the unused medications of friends or family members.<sup>13,16</sup>

Some US cities and states have formulated ED opioid prescribing guidelines<sup>17,18</sup> and developed prescription drug monitoring programs in hopes of preventing opioid abuse and deaths.<sup>19</sup> These recommendations can be summarized as follows: limit the prescription to a three-day supply (30 tablets maximum), avoid prescribing long-acting opioids, and avoid refilling lost or stolen prescriptions.<sup>20</sup> However, these guidelines were not based on prospectively collected data, and possibly neglected patient-centered outcomes such as quantity of opioids needed for pain relief.

Prospective surgical studies have shown wide variation in the number of opioid tablets prescribed for the same surgical procedure. Moreover, 58% to 92% of the prescribed opioids were unused,<sup>15,21-23</sup> and the majority (91%) were not properly stored or discarded,<sup>21</sup> leaving them accessible for potential misuse.<sup>24</sup> A study on ED opioid prescriptions draw their data from large retrospective<sup>25</sup> administrative databases, and did not distinguish between acute and chronic pain in their patient

1  
2 populations. In addition, they were unable to determine whether or not (and how many) opioids were  
3  
4 actually consumed.  
5

6 The main objective of this study was to determine the quantity of opioids consumed by ED-  
7  
8 patients discharged with an acute pain condition. Based on our pilot study,<sup>26</sup> we hypothesized that the  
9  
10 quantity of opioids that was consumed during the two weeks following an ED visit for acute pain  
11  
12 would be fewer than 10 tablets of morphine 5 mg (or equivalent).  
13  
14

## 15 16 **METHODS**

### 17 18 **Patient and public involvement**

19  
20  
21 This research originated from the rising death toll from opioids overdose. However, patients or  
22  
23 public were not involved in the design or conduct of the study.  
24  
25  
26  
27  
28

### 29 30 **Study design and setting**

31  
32 This prospective cohort study was conducted in the ED of a tertiary care level 1 trauma centre  
33  
34 academic hospital with an affiliated emergency medicine residency program and an annual census of  
35  
36 approximately 65,000 ED visits (mostly adults). Approval was obtained from the local institutional  
37  
38 ethics review board. Patients were informed that results of the study could be published and accessible  
39  
40 upon request.  
41  
42

### 43 44 **Selection of participants**

45  
46 Patients aged 18 years and older and treated in the ED from June 2016 to July 2017 were  
47  
48 identified by ED physicians 24/7 and then recruited by research nurses. We included patients with an  
49  
50 acute pain condition present for less than two weeks and discharged from ED with an opioid  
51  
52 prescription. A convenience sample was used because we were not able to reliably determine the  
53  
54 number of patients missed by ED physicians. We excluded patients who did not speak French or  
55  
56  
57

English, were using opioid medication prior to the ED visit, stayed in the ED > 48 hours, or were suffering from cancer or chronic pain.

## Measurements

ED physicians obtained patients' consent to be contacted by the research nurses to explain the study. The research nurses subsequently obtained informed consent. Patient demographic information, pain intensity at triage, arrival mode, triage priority, and length of ED stay were extracted from our computerized medical system. ED physicians entered the final diagnosis, pain intensity at discharge, and which pain medications were prescribed. Patients also received a 14-day diary in which the patient recorded for each day the quantity, the time and the name of all the pain medication consumed. Using pre-addressed and pre-stamped envelopes, these diaries were mailed back after completion. Partly because of the low percentage of the diary returned in our pilot study, two weeks post-ED visit, all patients responded were also interviewed over the phone by a research assistant and responded to five brief questions concerning their pain medication use and current pain intensity. Patients were asked if they had filled their opioid prescription; the quantity of opioids, acetaminophen, or nonsteroidal anti-inflammatory drugs (NSAIDs) they had consumed; and whether they had received and filled any new opioid prescriptions in the last two weeks. Patients were asked to report their pain on a verbal 11-point numerical rating scale (NRS) ranging from 0 to 10, where 0 represents "no pain at all" and 10 represent "the worst imaginable pain." The two-week follow-up period was chosen because acute pain usually lasts for a short time (days or a few weeks), during which most patients stop taking opioids (88% in our pilot study).<sup>26</sup> Study data were collected and managed using REDCap (Research Electronic Data Capture), a secure, web-based application tool hosted in the hospital.<sup>27</sup>

## Stratification

Because different pain diagnoses have different pain resolution patterns,<sup>28</sup> we expected the quantity of opioids required to treat acute pain to vary across pain conditions. The most frequently reported ED pain

1  
2 conditions in the literature and in our pilot study were musculoskeletal, fracture, renal colic, and  
3  
4 abdominal pain.<sup>25</sup> Our pilot data also showed that 85% of patients receiving opioids had one of these  
5  
6 four pain conditions.<sup>26</sup> For a more pragmatic approach, we included a group of patients with all other  
7  
8 uncategorized pain conditions (e.g., abscess, burn, tooth pain). These five pain condition categories  
9  
10 served as stratification variables for our main outcomes  
11  
12

### 13 **Outcomes**

14  
15 The main outcome of this study was the quantity of opioid tablets consumed during the two-  
16  
17 week follow-up period extracted from the paper diary or phone interview (if the diary was not  
18  
19 returned). The quantity of opioid tablets cannot be summed as it stands, due to the different potency of  
20  
21 different opioids. In addition, dosages vary across opioid types. In order to compare the different opioid  
22  
23 forms, each opioid prescription and consumption was transformed into tablets of morphine 5 mg  
24  
25 equivalent<sup>29 30</sup>, using Berdine and Nesbit's<sup>31</sup> method. A dosage of 3.33 mg of oxycodone and 1.25 mg  
26  
27 of hydromorphone were considered equipotent to one morphine 5 mg tablet. The second outcome was  
28  
29 the percentage of prescribed opioid tablets that were unused after the two-week follow-up. The third  
30  
31 outcome was determined as the number of morphine 5 mg tablets (or equivalent) that would adequately  
32  
33 supply for two weeks 80% of patients. Although not supported by any consensus, the 80% threshold  
34  
35 was used in a recent surgical study by Hill<sup>15</sup> and could provide a reasonable balance between sufficient  
36  
37 pain treatments for a large majority of patients while limiting the quantity of unused opioids. Since  
38  
39 some US cities and states have formulated ED opioid prescribing recommendations to limit the  
40  
41 prescription to a three-day supply (30 tablets maximum), we extracted from the 14-day diary the  
42  
43 quantity of morphine 5 mg tablets (or equivalent) to adequately supply 95% of patients during the first  
44  
45 three days after ED discharge. To facilitate application of the optimal prescription quantities in a  
46  
47 clinical setting, each patient's morphine 5 mg tablets (or equivalent) consumption was grouped into  
48  
49  
50  
51  
52  
53  
54  
55  
56  
57  
58  
59  
60

1  
2 five-tablet bins (0=0; 1 to 5=5, 6 to 10=10; up to a maximum number of five tablets) before threshold  
3  
4 calculations.  
5

6 Because different pain diagnoses have different pain resolution patterns,<sup>28</sup> we expected the  
7  
8 quantity of opioids required to treat acute pain to vary across pain conditions. The most frequently  
9  
10 reported pain conditions encountered in the ED are musculoskeletal, fracture, renal colic, and  
11  
12 abdominal pain.<sup>25</sup> Our pilot data from HSCM show that 85% of patients receiving opioids had one of  
13  
14 these four pain conditions.<sup>26</sup> For a more pragmatic approach, we included a group of patients with all  
15  
16 other previously undefined pain conditions (e.g., abscess, burn, tooth pain). These five pain condition  
17  
18 categories served as stratification variables for our main outcomes.  
19  
20  
21

## 22 23 **Analysis**

24  
25 The study sample size was estimated based on our pilot study, where we observed a  
26  
27 consumption of 8.8 opioid tablets (SD=10) during a two-week follow-up.<sup>26</sup> To detect a significant  
28  
29 difference from the null hypothesis ( $H_0=10$ ) using a Wilcoxon test assuming non-parametric  
30  
31 distribution, we had to recruit at least 499 patients to achieve a power of at least 0.80 with an alpha of  
32  
33 0.05 using a one-tailed test (PASS version 11.0; NCSS, LLC. Kaysville, Utah).  
34  
35  
36

37 The concordance between the 14-day diary and phone interview on the quantity of morphine 5  
38  
39 mg tablets (or equivalent) consumed was assessed with intraclass correlation coefficient. The quantity  
40  
41 of consumed pain medication is presented as a median with inter quartile range (IRQ), since it was not  
42  
43 normally distributed. Mann–Whitney U tests were used to assess the effect of sex and age (<65 vs  $\geq 65$ )  
44  
45 on the quantity of morphine 5 mg tablets (or equivalent) consumed. Wilcoxon signed rank tests were  
46  
47 performed to compare the quantity of consumed morphine 5 mg tablets (or equivalent) to the null  
48  
49 hypothesis (<10 tablets). The Kruskal–Wallis test was used to compare the quantity of consumed  
50  
51 morphine 5 mg tablets (or equivalent) across pain conditions. Two-by-two comparisons of the quantity  
52  
53 of consumed morphine 5 mg tablets (or equivalent) across pain conditions were made using Mann–  
54  
55  
56  
57



1  
2 Whitney U tests with Bonferroni correction for multiple testing. Finally, one-way anova with Tukey-b  
3  
4 post-hoc comparison tests were used to compare the percentage of unused opioids across pain  
5  
6 conditions. Alpha level was set at 0.05, and all statistics were performed using SPSS version 23 (IBM,  
7  
8 Somers, NY).

## 11 RESULTS

### 14 Description of study cohort

15  
16  
17 During our one-year recruitment period, a total of 1315 patients meeting the inclusion criteria  
18  
19 were initially contacted. Of these, 29% had exclusion criteria (64% for language barrier, 33% for  
20  
21 having chronic pain, and 3% for cancer pain), 13% declined to participate, and 10% could not be  
22  
23 reached for the 14-day follow-up, leaving 627 participants (Figure 1). Non-participating and included  
24  
25 patients were similar on all baseline characteristics (Table 1). Patients' mean age was 51 ( $\pm$ 16) years,  
26  
27 48% were female, and mean pain intensity at triage was 7.8, decreasing to 4.8 at ED discharge. Among  
28  
29 the 627 participants, 385 (61%) of them returned the 14-day diary, 547 (87%) patients responded to the  
30  
31 phone interview, and 310 (49%) had completed both assessments. Intraclass correlation coefficient  
32  
33 performed on opioids consumed was 0.72 (95%CI: 0.66-0.77) between the 14-day diary and phone  
34  
35 interview which is considered good concordance between both measures.<sup>32</sup> Furthermore, the median  
36  
37 number of morphine 5 mg tablets consumed was the same (6.7) for both phone interview and the 14-  
38  
39 day diary. Therefore, data from the phone interview was used for patients with missing the 14-day  
40  
41 diary.

### 47 Opioid consumption

48  
49  
50 Almost all patients filled their opioid prescription during the two-week follow-up period (95%).  
51  
52 The median quantity of prescribed morphine 5 mg tablets was 30 (IQR: 28), and similar across all pain  
53  
54 condition categories, varying from 24 to 34 tablets of morphine 5 mg (Table 2). Variability in the  
55  
56

1  
2 consumed pain medication for the “other” pain condition category was similar to that of the four more  
3  
4 common pain condition categories, suggesting that this patient group is comparable. The median  
5  
6 quantity of consumed morphine 5 mg tablets was low (7, IQR: 15) compared to the prescribed quantity,  
7  
8 and differed significantly from the null hypothesis ( $H_0: <10$ ;  $p < 0.001$ ). The consumed quantity varied  
9  
10 significantly across pain condition categories: from 3 tablets of morphine 5 mg for renal colic to 11  
11  
12 tablets morphine 5 mg for fracture ( $p < 0.001$ ). Multiple comparisons showed that patients suffering  
13  
14 from renal colic and abdominal pain consumed fewer opioids than those suffering from  
15  
16 musculoskeletal pain or fracture (all  $p < 0.05$ ). There was no significant effect of age ( $<65$  vs  $\geq 65$ ) or sex  
17  
18 on the quantity of consumed opioids during the two-week follow-up ( $p > 0.40$  for both). Of the whole  
19  
20 sample, 79% consumed opioids, 68% used acetaminophen, and 45% used NSAIDs.  
21  
22  
23  
24

### 25 **Percentage of unused opioids**

26  
27 Over the course of this study, patients discharged from the ED were prescribed 23,402 tablets of  
28  
29 morphine 5 mg, of which 7,353 were consumed during the two-week follow-up period, leaving a total  
30  
31 of 16,049 (68%) unused morphine 5 mg tablets. The percentage of unused opioids showed significant  
32  
33 differences across pain conditions ( $p < 0.01$ ): patients suffering from renal colic and abdominal pain  
34  
35 conditions did not use 81% and 78% of their opioids, respectively, and these were significantly higher  
36  
37 than patients suffering from musculoskeletal, fracture, or “other” pain condition (62% when averaging  
38  
39 3 categories; Figure 2).  
40  
41  
42

### 43 **Quantity of opioids to prescribe**

44  
45 Patients’ pain intensity at two weeks was low (2.0 average) across all pain conditions. Only a  
46  
47 minority of patients ( $<7\%$ ) filled a supplemental opioid prescription, indicating that the initial  
48  
49 prescriptions were sufficient to treat pain for 93% of patients during the two-week period. The quantity  
50  
51 of morphine 5 mg tablets to prescribe in order to adequately supply 80% the patients for two weeks  
52  
53 was 20 for musculoskeletal pain, 30 for fracture, 15 for renal colic or abdominal pain, and 20 for other  
54  
55  
56  
57

1 pain conditions . Patients suffering from renal colic or abdominal pain required only half the quantity  
2 compared to patients suffering from fractures (Figure 3). The quantity of morphine 5 mg tablets to  
3  
4 adequately supply 95% of patients during the first three days after ED discharge was 15.  
5  
6  
7

## 8 **DISCUSSION**

9  
10  
11  
12 This prospective study showed that patients discharged from the ED with an acute pain  
13 condition consumed a median of only 7 tablets of morphine 5 mg (or equivalent) but received a median  
14 of 30 tablets of morphine 5 mg (or equivalent) prescription, leaving two thirds of the opioids unused  
15 and available for misuse. Furthermore, patients with renal colic or abdominal pain tended to consume  
16 fewer opioids during the two-week follow-up compared to patients with musculoskeletal pain or  
17 fractures. We also determined that 20 tablets of morphine 5 mg (or equivalent) could adequately supply  
18 80% of patients while limiting the quantity of unused opioids.  
19  
20  
21  
22  
23  
24  
25  
26  
27

28  
29 The number of opioids prescribed to patients discharged from the ED with a pain condition in  
30 this study was similar to that reported for patients who had upper extremity surgery,<sup>22</sup> common general  
31 surgical procedures,<sup>15</sup> and urological surgery.<sup>21</sup> This one-size-fits-all approach, which does not take  
32 into account the patient's individual condition, can probably be attributed to the lack of clinical data on  
33 opioid consumption.<sup>17 18</sup> During the two-week follow-up, our 68% of opioids left unused is also within  
34 the range of percentages observed in surgical studies (58–92%).<sup>15 21-23</sup> . The purpose of this over-  
35 prescribing may be to offset the inconvenience, for both patient and physician, of return visits to the  
36 ED or another medical service to obtain another prescription.<sup>15</sup> However, these large quantities of  
37 unused opioids can be diverted to family and friends, resulting in misuse, dependence, and possibly  
38 death by overdose.<sup>21</sup>  
39  
40  
41  
42  
43  
44  
45  
46  
47  
48  
49  
50  
51

52  
53 Patients suffering from renal colic and abdominal pain needed fewer opioids than those  
54 suffering from a fracture or musculoskeletal pain. Rodgers et al. also reported differences in opioid  
55  
56  
57

1  
2 consumption between different types of surgery, finding that bone surgery required more opioids than  
3  
4 soft tissue procedures.<sup>22</sup> Furthermore, renal colic shows a unique pain resolution pattern: episodic  
5  
6 intense pain until the stone is expelled. These results underscore the need for practitioners to adjust  
7  
8 their opioid prescriptions to the type of pain condition. If patients in our study were prescribed opioids  
9  
10 in order to adequately supply 80% of the patients (20 tablets of morphine 5 mg or equivalent), a total of  
11  
12 10,492 (45%) tablets would not have been available for potential misuse. Since 7 tablets of morphine 5  
13  
14 mg (median consumed) would adequately supply 50% of patients, another way of limiting the quantity  
15  
16 of unused opioids would require the pharmacist to divide the opioid prescription into portions. Even if  
17  
18 repeatable opioid prescriptions are not allowed in most settings, physicians can prescribe a fixed  
19  
20 quantity of opioids while instructing the pharmacist to only supply a fraction at a time. For example, a  
21  
22 physician could prescribe 15 tablets of morphine 5 mg for a renal colic (and be sure to supply  
23  
24 adequately 80% of patients for 2 weeks) and ask the pharmacist to supply only 5 tablets at a time with  
25  
26 an expiration date of the prescription in two weeks. For physicians with an ED opioid prescribing  
27  
28 recommendations to limit the prescription to a three-day supply (30 tablets maximum), 15 tablets of  
29  
30 morphine 5 mg (or equivalent) would adequately supply 95% of patients for that period and limit  
31  
32 unused opioids. Opioids consumption could also be reduced if physicians instructed patients to use  
33  
34 acetaminophen and/or NSAIDs first to reduce their pain before using opioids.  
35  
36  
37  
38  
39  
40  
41

42 This trial has certain limitations. The convenience sample (investigators could not reliably  
43  
44 determine the number of missed patients) from one ED centre and the small sample size for less  
45  
46 frequent pain conditions (especially abdominal pain) limit the generalization of our results. However,  
47  
48 patients were recruited 24/7, and consecutive recruitment was limited only by the fact that the  
49  
50 investigators could not reliably determine the number of patients missed by ED physicians. It is also  
51  
52 possible that other hospitals with different populations or different approach to pain management (ex:  
53  
54 adequate dose of non-opioid analgesic first) could change opioid consumption.. Moreover, the reasons  
55  
56  
57  
58  
59  
60

1  
2 for the participants to stop consuming opioids were not recorded. Some patients may have restricted  
3  
4 their opioid use due to adverse effects, fear of addiction, or fear of running out of tablets, among others.  
5  
6 There is a need for a multi-centre prospective study with larger sample sizes for each pain condition, to  
7  
8 determine the impacts on the quantity of unused opioids and incidences of misuse, dependence, and  
9  
10 opioid overdose.  
11  
12  
13

14 In summary, patients who are discharged from the ED with an acute pain condition consumed a  
15  
16 median of fewer than 10 tablets of morphine 5 mg (or equivalent) during the following two weeks,  
17  
18 accounting for only one third of the prescribed opioids, leaving two thirds of the opioids unused and  
19  
20 available for potential misuse. The quantity of opioids to adequately supply 80% of patients for two  
21  
22 weeks was 20 tablets of morphine 5 mg (or equivalent) for musculoskeletal pain, 30 for fracture, 15 for  
23  
24 renal colic or abdominal pain, and 20 for other pain conditions. Also, 15 tablets of morphine 5 mg (or  
25  
26 equivalent) would adequately supply 95% of patients for the first three days. ED physicians should  
27  
28 consider prescribing a smaller quantity of opioids and asking the pharmacist to dispense them in  
29  
30 portions to minimize unused opioids. These results should be confirmed in a multi-centre prospective  
31  
32 study  
33  
34  
35  
36  
37

### 38 **Acknowledgments**

39  
40 The authors would like to thank Martin Marquis and Margaret McKyes for their contributions  
41  
42 to manuscript revision.  
43  
44  
45  
46  
47  
48  
49  
50  
51  
52  
53  
54  
55  
56  
57

**REFERENCES**

1. Perrone J, Nelson LS, Yealy DM. Choosing Analgesics Wisely: What We Know (and Still Need to Know) About Long-Term Consequences of Opioids. *Ann Emerg Med* 2015;**65**(5):500-2.
2. Gomes T, Mamdani MM, Paterson JM, et al. Trends in high-dose opioid prescribing in Canada. *Can Fam Physician* 2014;**60**(9):826-32.
3. Mazer-Amirshahi M, Mullins PM, Rasooly I, et al. Rising opioid prescribing in adult U.S. emergency department visits: 2001-2010. *Acad Emerg Med* 2014;**21**(3):236-43.
4. Cantrill SV, Brown MD, Carlisle RJ, et al. Clinical policy: critical issues in the prescribing of opioids for adult patients in the emergency department. *Ann Emerg Med* 2012;**60**(4):499-525.
5. Hasegawa K, Espinola JA, Brown DF, et al. Trends in U.S. emergency department visits for opioid overdose, 1993-2010. *Pain Med* 2014;**15**(10):1765-70.
6. CDC. Opioid overdoses in the United States. *J Pain Palliat Care Pharmacother* 2012;**26**(1):44-7.
7. Vital signs: overdoses of prescription opioid pain relievers---United States, 1999--2008. *MMWR Morb Mortal Wkly Rep* 2011;**60**(43):1487-92.
8. Dhalla IA, Mamdani MM, Sivilotti ML, et al. Prescribing of opioid analgesics and related mortality before and after the introduction of long-acting oxycodone. *Cmaj* 2009;**181**(12):891-6.
9. Beaudoin FL, Straube S, Lopez J, et al. Prescription opioid misuse among ED patients discharged with opioids. *Am J Emerg Med* 2014;**32**(6):580-5.
10. Wilsey BL, Fishman SM, Ogden C. Prescription opioid abuse in the emergency department. *J Law Med Ethics* 2005;**33**(4):770-82.
11. Fischer B, Argento E. Prescription opioid related misuse, harms, diversion and interventions in Canada: a review. *Pain Physician* 2012;**15**(3 Suppl):Es191-203.
12. Jones CM, Mack KA, Paulozzi LJ. Pharmaceutical overdose deaths, United States, 2010. *Jama* 2013;**309**(7):657-9.
13. Manchikanti L, Helm S, 2nd, Fellows B, et al. Opioid epidemic in the United States. *Pain Physician* 2012;**15**(3 Suppl):Es9-38.
14. CCSA. Canadian Centre on Substance Use and Addiction. 2017. Prescription opioids. Ottawa, Canada. <http://www.ccsa.ca/Resource%20Library/CCSA-Canadian-Drug-Summary-Prescription-Opioids-2017-en.pdf>.
15. Hill MV, McMahon ML, Stucke RS, et al. Wide Variation and Excessive Dosage of Opioid Prescriptions for Common General Surgical Procedures. *Ann Surg* 2017;**265**(4):709-14.
16. Maxwell JC. The prescription drug epidemic in the United States: a perfect storm. *Drug Alcohol Rev* 2011;**30**(3):264-70.
17. Neven DE, Sabel JC, Howell DN, et al. The development of the Washington State emergency department opioid prescribing guidelines. *J Med Toxicol* 2012;**8**(4):353-9.
18. Juurlink DN, Dhalla IA, Nelson LS. Improving opioid prescribing: the New York City recommendations. *JAMA* 2013;**309**(9):879-80.
19. Poon SJ, Greenwood-Ericksen MB. The opioid prescription epidemic and the role of emergency medicine. *Ann Emerg Med* 2014;**64**(5):490-5.
20. Weiner SG, Perrone J, Nelson LS. Centering the pendulum: the evolution of emergency medicine opioid prescribing guidelines. *Ann Emerg Med* 2013;**62**(3):241-3.
21. Bates C, Laciak R, Southwick A, et al. Overprescription of postoperative narcotics: a look at postoperative pain medication delivery, consumption and disposal in urological practice. *J Urol* 2011;**185**(2):551-5.
22. Rodgers J, Cunningham K, Fitzgerald K, et al. Opioid consumption following outpatient upper extremity surgery. *J Hand Surg Am* 2012;**37**(4):645-50.

23. Bicket MC, Long JJ, Pronovost PJ, et al. Prescription Opioid Analgesics Commonly Unused After Surgery: A Systematic Review. *JAMA Surg* 2017;**152**(11):1066-71.
24. Bartels K, Mayes LM, Dingmann C, et al. Opioid Use and Storage Patterns by Patients after Hospital Discharge following Surgery. *PLoS One* 2016;**11**(1):e0147972.
25. Hoppe JA, Nelson LS, Perrone J, et al. Opioid Prescribing in a Cross Section of US Emergency Departments. *Ann Emerg Med* 2015;**66**(3):253-59.e1.
26. Quantity of opioid to prescribe for acute pain to limit misuse after emergency department discharge. SAEM: Society for Academic Emergency Medicine; 2017; Orlando; US.
27. Harris PA, Taylor R, Thielke R, et al. Research electronic data capture (REDCap) – A metadata-driven methodology and workflow process for providing translational research informatics support. *J Biomed Inform* 2009;**42**(2):377-81.
28. Chapman CR, Fosnocht D, Donaldson GW. Resolution of acute pain following discharge from the emergency department: the acute pain trajectory. *J Pain* 2012;**13**(3):235-41.
29. Daoust R, Paquet J, Lavigne G, et al. Impact of age, sex and route of administration on adverse events after opioid treatment in the emergency department: a retrospective study. *Pain Res Manag* 2015;**20**(1):23-8.
30. O'Neil JT, Wang ML, Kim N, et al. Prospective Evaluation of Opioid Consumption After Distal Radius Fracture Repair Surgery. *Am J Orthop (Belle Mead NJ)* 2017;**46**(1):E35-e40.
31. Berdine HJ, Nesbit SA. Equianalgesic dosing of opioids. *J Pain Palliat Care Pharmacother* 2006;**20**(4):79-84.
32. Cicchetti DV. Guidelines, criteria, and rules of thumb for evaluating normed and standardized assessment instruments in psychology. *Psychological Assessment* 1994;**6**(4):284-90.

1  
2 Figure legends  
3

4  
5 Figure 1. Flow chart of patients' enrollment in the study.  
6

7  
8 Figure 2. Percentage of morphine 5 mg equivalent tablets that remained unused after the two-week  
9  
10 follow-up for each pain condition category. Mean  $\pm$  sem are reported. Brackets indicate the results of  
11  
12 the Tukey-b multiple comparisons tests. Renal colic and abdominal pain have higher percentage of  
13  
14 unused opioids than each of the three other pain conditions.  
15  
16

17  
18 Figure 3. Number of morphine 5 mg tablets (or equivalent) to prescribe to supply 80% of patients for  
19  
20 each pain condition category.  
21  
22



Table 1. Comparison of baseline characteristics between included and excluded (refused to participate or were lost to the 14-day follow-up) patients.

| Baseline characteristics                                     | Included<br>(N=627) | Excluded<br>(N=310) |
|--------------------------------------------------------------|---------------------|---------------------|
| Mean age ( $\pm$ SD)                                         | 51.0 (15.9)         | 50.0 (17.8)         |
| Female (%)                                                   | 47.8                | 49.0                |
| ED arrival mode (%)                                          |                     |                     |
| -By himself                                                  | 78.6                | 79.9                |
| -By ambulance                                                | 21.3                | 20.1                |
| High (level 1 or 2) triage priority (%)                      | 42.6                | 45.3                |
| Mean pain intensity (0-10 scale) at triage ( $\pm$ SD)       | 7.8 (2.0)           | 8.0 (1.7)           |
| ED treatment section (%)                                     |                     |                     |
| -Ambulatory                                                  | 64.6                | 64.1                |
| -On stretcher                                                | 35.4                | 35.9                |
| Type of pain conditions (%)                                  |                     |                     |
| -Musculoskeletal pain                                        | 44.0                | 40.3                |
| -Fracture                                                    | 19.1                | 19.7                |
| -Renal colic                                                 | 17.0                | 17.7                |
| -Abdominal pain                                              | 6.0                 | 5.2                 |
| -Other                                                       | 13.9                | 17.1                |
| Received a Tylenol prescription at ED discharged (%)         | 71.6                | 70.3                |
| Received a NSAIDs prescription at ED discharged (%)          | 45.8                | 47.4                |
| Opioid prescription type (%)                                 |                     |                     |
| -Morphine                                                    | 43.6                | 42.7                |
| -Oxycodone                                                   | 40.5                | 36.9                |
| -Hydromorphone                                               | 15.9                | 20.4                |
| Median (IQR) morphine 5 mg equivalent tablets prescription   | 30 (28)             | 30 (25)             |
| Median (IQR) ED stay (hours)                                 | 5.3 (3.6-7.7)       | 5.2 (3.7-7.9)       |
| Mean ( $\pm$ SD) pain intensity (0-10 scale) at ED discharge | 4.8 (2.9)           | 4.7 (2.9)           |

IQR: inter-quartile range; NSAIDs: nonsteroidal anti-inflammatory drug

Table 2. Pain intensity and pain medication for each pain condition during the two-week follow-up.

| Variables                                              | Musculo-skeletal | Fracture  | Renal colic | Abdominal | Other     | Total     |
|--------------------------------------------------------|------------------|-----------|-------------|-----------|-----------|-----------|
| Number of patients                                     | 280              | 119       | 106         | 37        | 85        | 627       |
| Mean ( $\pm$ SD) pain intensity at ED discharged       | 5.6 (2.4)        | 5.2 (2.6) | 1.9 (2.7)   | 3.7 (3.2) | 5.5 (3.0) | 4.8 (2.9) |
| Mean ( $\pm$ SD) pain intensity at two-week            | 2.6 (2.7)        | 2.6 (2.9) | 0.5 (1.2)   | 1.6 (2.8) | 1.8 (2.6) | 2.0 (2.6) |
| Filled opioid prescription (%)                         | 95.1             | 90.4      | 99.0        | 97.1      | 91.4      | 94.5      |
| Patients who filled another opioid prescription (n, %) | 22 (7.9)         | 10 (8.4)  | 3 (2.8)     | 2 (5.4)   | 5 (5.9)   | 42 (6.7)  |
| Median (IQR) number of morphine 5 mg prescribed        | 30 (28)          | 34 (30)   | 31 (25)     | 30 (19)   | 24 (26)   | 30 (28)   |
| Median (IQR) number of morphine 5 mg consumed          | 8 (17)           | 11 (20)   | 3 (10)      | 3 (8)     | 6 (14)    | 7 (15)    |
| Received acetaminophen prescription at discharged (%)  | 78.2             | 79.0      | 57.5        | 56.8      | 63.5      | 71.6      |
| Consumed acetaminophen (%)                             | 73.9             | 87.4      | 49.1        | 48.6      | 52.9      | 67.9      |
| Received NSAIDs prescription at discharged (%)         | 49.3             | 28.6      | 64.2        | 40.5      | 37.6      | 45.8      |
| Consumed NSAIDs (%)                                    | 51.8             | 35.3      | 50.9        | 35.1      | 34.1      | 45.1      |

IQR: inter-quartile range; tablet; NSAIDs: nonsteroidal anti-inflammatory drugs

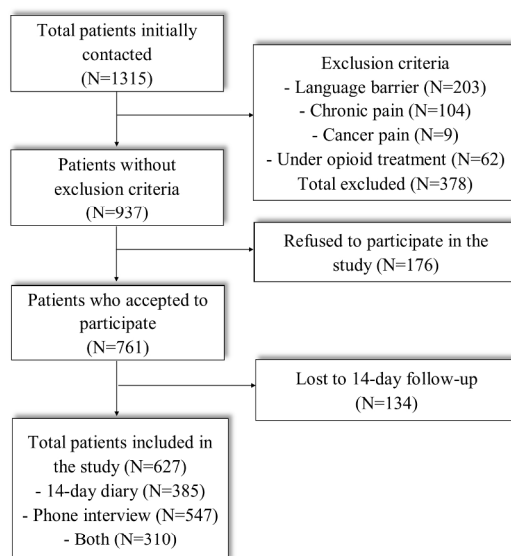

Figure 1. Flow chart of patients' enrollment in the study.

215x279mm (300 x 300 DPI)



Figure 2. Percentage of morphine 5 mg equivalent pills that remained unused after the two-week follow-up for each pain condition category. Mean  $\pm$  sem are reported. Brackets indicate the results of the Tukey-b multiple comparisons tests. Renal colic and abdominal pain have higher percentage of unused opioids than each of the three other pain conditions.

230x169mm (300 x 300 DPI)



Figure 3. Number of morphine 5 mg equivalent pills to prescribe to supply 80% of patients for each pain condition category.

237x169mm (300 x 300 DPI)

## STROBE Statement—checklist of items that should be included in reports of observational studies

|                              | Item No | Recommendation                                                                                                                                                                                                                                                                                                                                                                                                                                                                                                                                                                                                                                                                                             |
|------------------------------|---------|------------------------------------------------------------------------------------------------------------------------------------------------------------------------------------------------------------------------------------------------------------------------------------------------------------------------------------------------------------------------------------------------------------------------------------------------------------------------------------------------------------------------------------------------------------------------------------------------------------------------------------------------------------------------------------------------------------|
| <b>Title and abstract</b>    | 1       | (a) Indicate the study's design with a commonly used term in the title or the abstract<br>Page 1<br>(b) Provide in the abstract an informative and balanced summary of what was done and what was found<br>Page 3                                                                                                                                                                                                                                                                                                                                                                                                                                                                                          |
| <b>Introduction</b>          |         |                                                                                                                                                                                                                                                                                                                                                                                                                                                                                                                                                                                                                                                                                                            |
| Background/rationale         | 2       | Explain the scientific background and rationale for the investigation being reported<br>Page 5                                                                                                                                                                                                                                                                                                                                                                                                                                                                                                                                                                                                             |
| Objectives                   | 3       | State specific objectives, including any prespecified hypotheses<br>Page 6                                                                                                                                                                                                                                                                                                                                                                                                                                                                                                                                                                                                                                 |
| <b>Methods</b>               |         |                                                                                                                                                                                                                                                                                                                                                                                                                                                                                                                                                                                                                                                                                                            |
| Study design                 | 4       | Present key elements of study design early in the paper<br>Page 6                                                                                                                                                                                                                                                                                                                                                                                                                                                                                                                                                                                                                                          |
| Setting                      | 5       | Describe the setting, locations, and relevant dates, including periods of recruitment, exposure, follow-up, and data collection<br>Page 6                                                                                                                                                                                                                                                                                                                                                                                                                                                                                                                                                                  |
| Participants                 | 6       | (a) <i>Cohort study</i> —Give the eligibility criteria, and the sources and methods of selection of participants. Describe methods of follow-up<br>Page 6<br><i>Case-control study</i> —Give the eligibility criteria, and the sources and methods of case ascertainment and control selection. Give the rationale for the choice of cases and controls<br><i>Cross-sectional study</i> —Give the eligibility criteria, and the sources and methods of selection of participants<br>(b) <i>Cohort study</i> —For matched studies, give matching criteria and number of exposed and unexposed<br><i>Case-control study</i> —For matched studies, give matching criteria and the number of controls per case |
| Variables                    | 7       | Clearly define all outcomes, exposures, predictors, potential confounders, and effect modifiers. Give diagnostic criteria, if applicable<br>Page 7                                                                                                                                                                                                                                                                                                                                                                                                                                                                                                                                                         |
| Data sources/<br>measurement | 8*      | For each variable of interest, give sources of data and details of methods of assessment (measurement). Describe comparability of assessment methods if there is more than one group<br>Page 6                                                                                                                                                                                                                                                                                                                                                                                                                                                                                                             |
| Bias                         | 9       | Describe any efforts to address potential sources of bias<br>Page 8                                                                                                                                                                                                                                                                                                                                                                                                                                                                                                                                                                                                                                        |
| Study size                   | 10      | Explain how the study size was arrived at<br>Page 8                                                                                                                                                                                                                                                                                                                                                                                                                                                                                                                                                                                                                                                        |
| Quantitative variables       | 11      | Explain how quantitative variables were handled in the analyses. If applicable, describe which groupings were chosen and why<br>Page 8                                                                                                                                                                                                                                                                                                                                                                                                                                                                                                                                                                     |
| Statistical methods          | 12      | (a) Describe all statistical methods, including those used to control for confounding                                                                                                                                                                                                                                                                                                                                                                                                                                                                                                                                                                                                                      |

1  
2 Page 8

---

3 (b) Describe any methods used to examine subgroups and interactions

4 Page 8

---

5 (c) Explain how missing data were addressed

6 Page 9

---

7 (d) *Cohort study*—If applicable, explain how loss to follow-up was addressed

8 Page 9

9 *Case-control study*—If applicable, explain how matching of cases and controls was  
10 addressed

11 *Cross-sectional study*—If applicable, describe analytical methods taking account of  
12 sampling strategy

---

13 (e) Describe any sensitivity analyses

14 No sensitivity analysis

15  
16 Continued on next page

17  
18  
19  
20  
21  
22  
23  
24  
25  
26  
27  
28  
29  
30  
31  
32  
33  
34  
35  
36  
37  
38  
39  
40  
41  
42  
43  
44  
45  
46  
47  
48  
49  
50  
51  
52  
53  
54  
55  
56  
57  
58  
59  
60

For peer review only

**Results**

|                  |     |                                                                                                                                                                                                                         |
|------------------|-----|-------------------------------------------------------------------------------------------------------------------------------------------------------------------------------------------------------------------------|
| Participants     | 13* | (a) Report numbers of individuals at each stage of study—eg numbers potentially eligible, examined for eligibility, confirmed eligible, included in the study, completing follow-up, and analysed<br>Page 9             |
|                  |     | (b) Give reasons for non-participation at each stage<br>Page 9                                                                                                                                                          |
|                  |     | (c) Consider use of a flow diagram<br>Page 9                                                                                                                                                                            |
| Descriptive data | 14* | (a) Give characteristics of study participants (eg demographic, clinical, social) and information on exposures and potential confounders<br>Page 9                                                                      |
|                  |     | (b) Indicate number of participants with missing data for each variable of interest                                                                                                                                     |
|                  |     | (c) <i>Cohort study</i> —Summarise follow-up time (eg, average and total amount)<br>Page 9                                                                                                                              |
| Outcome data     | 15* | <i>Cohort study</i> —Report numbers of outcome events or summary measures over time<br>Page 10                                                                                                                          |
|                  |     | <i>Case-control study</i> —Report numbers in each exposure category, or summary measures of exposure                                                                                                                    |
|                  |     | <i>Cross-sectional study</i> —Report numbers of outcome events or summary measures                                                                                                                                      |
| Main results     | 16  | (a) Give unadjusted estimates and, if applicable, confounder-adjusted estimates and their precision (eg, 95% confidence interval). Make clear which confounders were adjusted for and why they were included<br>Page 10 |
|                  |     | (b) Report category boundaries when continuous variables were categorized                                                                                                                                               |
|                  |     | (c) If relevant, consider translating estimates of relative risk into absolute risk for a meaningful time period                                                                                                        |
| Other analyses   | 17  | Report other analyses done—eg analyses of subgroups and interactions, and sensitivity analyses                                                                                                                          |

**Discussion**

|                  |    |                                                                                                                                                                                       |
|------------------|----|---------------------------------------------------------------------------------------------------------------------------------------------------------------------------------------|
| Key results      | 18 | Summarise key results with reference to study objectives<br>Page 10                                                                                                                   |
| Limitations      | 19 | Discuss limitations of the study, taking into account sources of potential bias or imprecision.<br>Page 12<br>Discuss both direction and magnitude of any potential bias<br>Page 12   |
| Interpretation   | 20 | Give a cautious overall interpretation of results considering objectives, limitations, multiplicity of analyses, results from similar studies, and other relevant evidence<br>Page 11 |
| Generalisability | 21 | Discuss the generalisability (external validity) of the study results<br>Page 12                                                                                                      |

**Other information**

|         |    |                                                                                                                                                                         |
|---------|----|-------------------------------------------------------------------------------------------------------------------------------------------------------------------------|
| Funding | 22 | Give the source of funding and the role of the funders for the present study and, if applicable, for the original study on which the present article is based<br>Page 1 |
|---------|----|-------------------------------------------------------------------------------------------------------------------------------------------------------------------------|



1  
2 \*Give information separately for cases and controls in case-control studies and, if applicable, for exposed and  
3 unexposed groups in cohort and cross-sectional studies.  
4

5 **Note:** An Explanation and Elaboration article discusses each checklist item and gives methodological background and  
6 published examples of transparent reporting. The STROBE checklist is best used in conjunction with this article (freely  
7 available on the Web sites of PLoS Medicine at <http://www.plosmedicine.org/>, Annals of Internal Medicine at  
8 <http://www.annals.org/>, and Epidemiology at <http://www.epidem.com/>). Information on the STROBE Initiative is  
9 available at [www.strobe-statement.org](http://www.strobe-statement.org).  
10  
11  
12  
13  
14  
15  
16  
17  
18  
19  
20  
21  
22  
23  
24  
25  
26  
27  
28  
29  
30  
31  
32  
33  
34  
35  
36  
37  
38  
39  
40  
41  
42  
43  
44  
45  
46  
47  
48  
49  
50  
51  
52  
53  
54  
55  
56  
57  
58  
59  
60
